# Supplementary material
Source: PubMed Central journal article supplement (PMC6741345)
Supplement: NIHMS1536873-supplement-Supplement1.pdf [file NIHMS1536873-supplement-Supplement1.pdf]

## Supplementary Appendix

This appendix has been provided by the authors to give readers additional information about their work.

Supplement to: The National Heart, Lung, and Blood Institute PETAL Clinical Trials Network. Early neuromuscular blockade in the acute respiratory distress syndrome. *N Engl J Med* 2019;380:1997-2008. DOI: 10.1056/NEJMoa1901686

# **Early Neuromuscular Blockade in the Acute Respiratory Distress Syndrome**

## **Supplementary Materials**

## Table of Contents

|                                                                                                                                                        |    |
|--------------------------------------------------------------------------------------------------------------------------------------------------------|----|
| Collaborators .....                                                                                                                                    | 3  |
| Re-evaluation of Systemic Early Neuromuscular Blockade (ROSE) Investigators .....                                                                      | 3  |
| Supplementary methods .....                                                                                                                            | 5  |
| Trial design and oversight.....                                                                                                                        | 5  |
| Inclusion criteria additional explanation.....                                                                                                         | 5  |
| Exclusion criteria.....                                                                                                                                | 6  |
| Additional methods .....                                                                                                                               | 7  |
| Additional outcome measures.....                                                                                                                       | 8  |
| Supplementary figures .....                                                                                                                            | 9  |
| Figure S1. PaO <sub>2</sub> /FIO <sub>2</sub> ratios and PEEP levels during the first week .....                                                       | 9  |
| Figure S2. Survival curves for the subgroups, PaO <sub>2</sub> /FIO <sub>2</sub> <120 and ≥120 mmHg.....                                               | 10 |
| Supplementary tables.....                                                                                                                              | 11 |
| Table S1. Additional baseline characteristics .....                                                                                                    | 11 |
| Table S2. Comparison of patients enrolled by a qualifying PaO <sub>2</sub> /FIO <sub>2</sub> ratio or SpO <sub>2</sub> / FIO <sub>2</sub> ratios ..... | 11 |
| Table S3. Cisatracurium drug dosing information .....                                                                                                  | 12 |
| Table S4. Daily 'on study' sedation parameters from baseline through study day 7 .....                                                                 | 13 |
| Table S5. Ventilator and patient physiological parameters over time .....                                                                              | 14 |
| Table S6. Improvement in PaO <sub>2</sub> /FIO <sub>2</sub> stratified by the median time to study enrollment .....                                    | 15 |
| Table S7. Compliance with the study protocol high PEEP/ FIO <sub>2</sub> table .....                                                                   | 15 |
| Table S8. Additional measures of 'on protocol' compliance .....                                                                                        | 16 |
| Table S9. Day 90 mortality percentage stratified by PaO <sub>2</sub> /FIO <sub>2</sub> ratio.....                                                      | 17 |
| Table S10. Day 90 mortality percentage stratified by duration of ARDS prior to randomization .....                                                     | 17 |
| Table S11. Day 90 mortality percentage stratified by hospital tercile for prior NMB use .....                                                          | 17 |
| Table S12. Day 90 mortality percentage estimates stratified by gender.....                                                                             | 17 |
| Table S13. Day 90 mortality percentage estimates stratified by race .....                                                                              | 17 |
| Table S14. Day 90 mortality percentage estimates stratified by ethnicity.....                                                                          | 18 |
| Table S15. Day 90 mortality percentage stratified by hospital tercile for MD study refusal .....                                                       | 18 |
| Table S16. Sequential Organ Failure Assessment (SOFA) scores .....                                                                                     | 19 |
| Table S17. Organ failure free days .....                                                                                                               | 20 |
| Table S18. Use of adjunctive therapies .....                                                                                                           | 20 |
| Table S19. Glucocorticoid use during the first week.....                                                                                               | 20 |
| Table S20. Mortality percentage estimates at study day 90 and day 365 .....                                                                            | 20 |
| Table S21. Outcomes at 3 months .....                                                                                                                  | 21 |
| Table S22. Outcomes at 6 months.....                                                                                                                   | 22 |
| Table S23. Outcomes at 12 months .....                                                                                                                 | 23 |
| Table S24. Safety measures observed during the 6 hours after randomization .....                                                                       | 24 |
| Table S25. Adverse events by organ system, event and severity.....                                                                                     | 24 |
| Table S26. Mortality percentage estimates during the first 48 and 96 hours.....                                                                        | 25 |
| Table S27. In-hospital recall assessments .....                                                                                                        | 25 |
| Table S28. In-hospital neuromuscular assessments .....                                                                                                 | 26 |
| References.....                                                                                                                                        | 29 |

## Collaborators

---

### Re-evaluation of Systemic Early Neuromuscular Blockade (ROSE) Investigators

#### The National Heart, Lung, and Blood Institute (NHLBI) Prevention and Early Treatment of Acute Lung Injury (PETAL) Clinical Trials Network

**ALIGNÉ Clinical Center:** Baystate Medical Center – Jay S. Steingrub\*, Mark Tidswell, Lori Kozikowski, Leslie De Souza, Cynthia Kardos; Brigham and Women’s Hospital – Peter C. Hou\*, Imo P. Aisiku, Rebecca M. Baron, Anthony F. Massaro, Raghu R. Seethala, Laura E. Fredenburgh, Zachary A. Gandee, Arman Israelyan; Maine Medical Center – Richard R. Riker, Adelene Macleoad, Theresa May, David Seder, Thomas E. Van der Kloot; Tufts Medical Center – Nicholas S. Hill, Veronica Bacong, Haval Chweich, Erik Garpestad, Omar Schweish

**BOSTON Clinical Center:** Beth Israel Deaconess Medical Center – Daniel Talmor\*, Nathan Shapiro\*, Valerie Banner-Goodspeed, Sayuri Jinadasa, Andres Brenes Bastos; Massachusetts General Hospital – Ednan Bajwa, Michael R. Filbin, Kathryn A. Hibbert, Carrie Holland, Kelsey Brait; St. Vincent Hospital – Patricia A. Arsenault, Pam Sigel; University of Mississippi Medical Center – Alan E. Jones, John R. Spurzem, Michael Puskarich, Margaret Hope Cruise, Jasmine J. Kolb, Deepti Patki

**CALIFORNIA Clinical Center:** UCSF San Francisco – Michael A. Matthay\*, Kathleen D. Liu, Carolyn S. Calfee, Jeffrey E. Gotts, Brian M. Daniel, Annika Belzer; UCLA Medical Center – Gregory W. Hendey\*, Steven Y. Chang, Nida Qadir, Bryan Garber, Stephanie Guo, Scott Lewis, Jamal Sharif; Stanford University Medical Center – Joseph Levitt, Angela Rogers, Rosemary Vojnik, Adijat T. Asuni; UC Davis – Timothy E. Albertson, Jason Y. Adams, Maya Juarez, Brian Morrissey, Skyler Pearson; UCSF Fresno – Eyad Almasri, Janna M. Blaauw, Alyssa Hughes, Kyndra Sousa

**COLORADO Clinical Center:** University of Colorado Hospital – Adit Ginde\*, Marc Moss\*, Lani Finck, Carrie Higgins, Jeffrey McKeegan; Denver Health Medical Center – Ivor S. Douglas, Jason Haukoos, Terra Hiller, Emily Hopkins, Judy L. Oaks, Katie Overdier, Meggan Schmidt; Medical Center of Aurora – David C. Van Pelt, Jonathan S. Tashkin, Joan Reischel; National Jewish Health – Saint Joseph’s Hospital – James H. Finigan, Kenneth Lyn-Kew, Ryan D. Paterson; Swedish Medical Center – Luciano Lemos-Filho

**MICHIGAN Clinical Center:** University of Michigan Medical Center – Robert C. Hyzy\*, Pauline K. Park\*; Kristine Nelson, Ivan N. Co, Jakob I. McSparron, Tina Chen, Sinan Hanna, Normal Olbrich; Henry Ford Health System – Bruno M. DiGiovine, Emanuel P. Rivers, Jackie Day, Jasreen Gill, Jayna Gardner Gray, Gina Hurst, Namita Jayaprakash, Anja Kathrina Jaehne, Sarah Rubino, Jennifer Swiderek, Jacqueline Pflaum; Indiana University Medical Center – Mark Williams, Rajat Kapoor, Tim Ellender, Daniel Gutteridge, Jean Nash

**MONTEFIORE-SINAI Clinical Center:** Montefiore Medical Center – Michelle Ng Gong\*, Aluko A. Hope, Jen-Ting Chen, Swarna Gummadi, Damaris Fuster, Missiel E. Munoz, Brenda Lopez; Mount Sinai Hospital – Lynne D. Richardson\*, Sam Acquah, Kusum Mathews, Lisa Richman, Neha N. Goel, Nan Li, Gabriel Schneider, Cindy Clesca, Natalie S. Massenburg

**OHIO Clinical Center:** Cleveland Clinic Foundation – R Duncan Hite\*, Abhijit Duggal, Andrei Hastings, Omar Mehkri, Tarik Hanane, Andrea Rice; OSU Wexner Medical Center – Thomas E. Terndrup\*, Matthew C. Exline, Joshua Englert, Emily Robart, Sonal Pannu, Naeem A. Ali; Summa Akron City

Hospital – Jennifer A. Frey, Kirk A. Stiffler; University of Cincinnati Medical Center – David Norton, Tammy Roads, Autumn Studer, Kristin Hudock

**PITTSBURGH Clinical Center:** UPMC Presbyterian – Derek C. Angus\*, Donald M. Yealy\*, David T. Huang, Bryan J. McVerry, Denise Scholl, Caroline Gacka, Pavan Thangudu, Rajagopala Padmanabhan, Vikram Balakumar; UPMC Shadyside – Jennifer G. McComb, Pam Fazio, Mary Stefanick; UPMC Mercy – Chenell L. Donadee, Matthew Siedsma; UPMC Magee – Raghavan Murugan, Andrew Jockers; Penn State Hershey Medical Center – Nancy Campbell, Allison Muller, Susan B. Promes

**PACIFIC NORTHWEST Clinical Center:** Harborview Medical Center – Catherine Hough\*, Bryce R.H. Robinson\*, Nicholas J. Johnson, Stephanie Gundel, Sarah C. Katsandres, Anna M. Ungar, Jennifer Cardey; University of Washington Medical Center – Tzevan Poon, Sarah Dean; Oregon Health and Science University – Steven Haberkorn, Ebaad Haq, Bory Kea, Martin A. Schreiber, Akram Khan; Swedish Hospital – Shane D O’Mahony, Charlene Boisjolie

**SOUTHEAST Clinical Center:** Wake Forest Baptist Health – D. Clark Files\*, Chadwick D. Miller\*, Rita Bakhru, Lori S. Flores, Kevin Gibbs, Mary LaRose and Lina Purcell; Cone Health – Patrick E. Wright; University of Virginia Medical Center – Kyle B. Enfield, Mark Sochor, Alexandra Kadl, Mary Marshall; University of Kentucky – Peter E. Morris, Sanjay Dhar, Ashley Montgomery-Yates, Jamie Sturgill, Sara Pasha; VCU Medical Center – Marjolein de Wit, Stella Hamman

**UTAH Clinical Center:** Intermountain Medical Center – Colin K Grissom\*, Joseph Bledsoe\*, Todd Allen\*, Naresh Kumar, Samuel M. Brown, Mona Hopkins, Michael Lanspa, Ithan Peltan, Ellie Hirshberg, James Orme, Mardee Merrill; LDS Hospital – Quinn Montgomery, Katie Brown, Brent Armbruster, Valerie Aston, Terry Clemmer; McKay Dee Hospital – Kira Knight, Aaron Shepherd, Corey Sillito, Barbara Kerwin; University of Utah Hospital – Robert Paine, Estelle Harris, Elizabeth Middleton, Amber Plante; Utah Valley Regional Medical Center – Dixie Harris, Wayne Woodward, David Nielsen

**VANDERBILT Clinical Center:** Vanderbilt University Medical Center – Todd W. Rice\*, Wesley H. Self\*, Matthew W. Semler, Margaret Hayes, Susan Mogan, Adrienne Baughman; Louisiana State University Health Sciences Center - New Orleans – David R. Janz, Paula Lauto, Margaret M. Moore, Bennett P. deBoisblanc, John P. Hunt, Jennifer L. Mooney, Sarah E. Jolley

**Clinical Coordinating Center:** Massachusetts General Hospital Biostatistics Center (CCC): David A. Schoenfeld\*, B. Taylor Thompson, Kathleen Tiffany Lee, Christine Ulysse, Cathryn F. Oldmixon, Nancy J. Ringwood, Jenna R. Pedrin, Richard E. Morse, Douglas Hayden

**National Heart, Lung, and Blood Institute:** Karen Bienstock, Carol J. Blaisdell, Andrea L. Harabin, Lora A. Reineck, Peyvand Ghofrani, Myron A. Waclawiw, Gail Weinmann

**Protocol Review Committee:** Laurie J. Morrison, Charles B. Cairns, Shannon Carson, D. Mark Courtney, Mark N. Gillespie, Richard J. Kryscio

**Data and Safety Monitoring Board:** Polly Parsons, Jason D. Christie, Jesse R. Hall, Nicholas J. Horton, Jeffrey A. Kline, Mitchell Levy, Mark Siegel, Ian Stiell, Laurie S. Zoloth

\*Clinical Center Lead Principal Investigator

## Supplementary methods

---

### Trial design and oversight

Trial data were collected by the PETAL network investigators, monitored by the PETAL clinical coordinating center, and analyzed by the authors, who drafted the manuscript and vouch for the accuracy and completeness of the analyses and for the fidelity of the trial to the protocol. All authors made the decision to submit the manuscript for publication. The randomization to 48-hour continuous infusion of cisatracurium with concomitant deep sedation (intervention group) or to a usual care approach of lighter sedation targets (control group) obviated the ability for providers and bedside research staff to be blinded to the intervention assignment.

### Inclusion criteria additional explanation

We selected our hypoxemia inclusion criterion to ensure a non-transient hypoxemia that persisted despite elevated positive end expiratory pressure (PEEP). The hypoxemia criterion was adjusted for the sites at an altitude of greater than 1000 meters (Denver, CO and Salt Lake City, UT). The  $\text{PaO}_2/\text{FIO}_2$  criterion of 150 mmHg with  $\text{PEEP} \geq 8 \text{ cmH}_2\text{O}$  was multiplied by the ambient barometric pressure divided by sea level barometric pressure. The onset of illness was defined as within one week of a known clinical insult or new or worsening respiratory symptoms. If an arterial blood gas analysis was unavailable, an initial analysis in which the  $\text{PaO}_2$  was inferred from the oxygen saturation measured by pulse oximetry ( $\text{SpO}_2$ ) was used to estimate the  $\text{PaO}_2/\text{FIO}_2$  ratio at  $\text{PEEP} \geq 8 \text{ cmH}_2\text{O}$ . An inferred  $\text{PaO}_2/\text{FIO}_2 < 150 \text{ mmHg}$ , if confirmed by a second assessment using  $\text{SpO}_2$  1-6 hours later could be used to fulfill the hypoxemia criterion.

## Exclusion criteria

1. Lack of informed consent
2. Continuous neuromuscular blockade (NMB) at enrollment (>2 NMB boluses excluding NMB given for reasons other than ARDS management [e.g., intubation or transport] or >3h continuous infusion)
3. Known pregnancy
4. Currently receiving extracorporeal membrane oxygenation therapy
5. Chronic respiratory failure defined as PaCO<sub>2</sub> >60 mmHg in the outpatient setting
6. Home mechanical ventilation (non-invasive or via tracheotomy) except for continuous or bilevel positive airway pressure support used solely for sleep-disordered breathing
7. Actual body weight exceeding 1 kg per centimeter of height
8. Severe chronic liver disease defined as a Child-Pugh score of 12-15
9. Bone marrow transplantation within the last year
10. Expected duration of mechanical ventilation <48 hours
11. Decision to withhold life-sustaining treatment, not including those patients committed to full support except cardiopulmonary resuscitation
12. Moribund patient not expected to survive 24 hours; if cardiopulmonary resuscitation (CPR) provided, assess for moribund status ≥6 hours from CPR conclusion
13. Diffuse alveolar hemorrhage from vasculitis
14. Burns >70% of total body surface
15. Unwillingness to utilize the NHLBI Acute Respiratory Distress Network (ARDS) Network 6 ml/kg ideal body weight ventilation protocol
16. Previous hypersensitivity or anaphylactic reaction to cisatracurium
17. Neuromuscular conditions that may potentiate NMB or impair spontaneous ventilation (study protocol, appendix A2)
18. Neurologic conditions undergoing treatment for intracranial hypertension
19. Enrollment in an interventional ARDS trial with direct impact on neuromuscular blockade and PEEP
20. Pa O<sub>2</sub>/FiO<sub>2</sub> (if available) >200 mmHg after meeting inclusion criteria and before randomization
21. Endotracheal ventilation for greater than 120 hours (5 days)
22. Patient has completed lung transplant evaluation and has been officially listed for lung transplant by the United Network for Organ Sharing organization

## Additional methods

1. The randomization used a permuted block design stratified by site.
2. Before implementing initial changes to PEEP, a PETAL investigator or designee determined hemodynamic appropriateness using the following criteria: mean arterial pressure  $>55$  mmHg or systolic blood pressure  $>80$  mmHg, and no fluid bolus or increase in vasopressor dosing for greater than 15 minutes. If hypotension occurred with the increase in PEEP, the protocol (study protocol, page 25) recommended the administration of a fluid bolus.
3. During shock, fluid management was unrestricted; and a simplified fluid conservative approach was recommended for those patients without shock (study protocol, page 54). A version of the protocolized NHLBI ARDS Network weaning strategy was also utilized (study protocol, pages 51-53).
4. All sites used the sedation scales with which clinical staff were already trained to administer as part of routine care. There were 3 scales used across sites: the Richmond Agitation-Sedation Score (RASS), the Riker Sedation Agitation Scale, and the Ramsay Sedation Scale.<sup>1-3</sup> RASS ranges from +4 (combative) to -5 (unarousable), Riker from 1 (unarousable) to 7 (dangerous agitation), and Ramsay from 1 (anxious/restless) to 6 (unresponsive).
5. Before initiating neuromuscular blockade, study staff ensured (and documented) deep sedation defined as a RASS score of -5 [range: +4 (combative) to -5 (unarousable)], a Riker Sedation Agitation Scale score of 1-2 [range: 1 (unarousable) to 7 (dangerous agitation), where 2 equals very sedated], or a Ramsay Sedation Scale score of 5-6 [range: 1 (anxious/restless) to 6 (unresponsive), where 5 equals a sluggish response to stimulus]. Staff also ensured patients were receiving controlled modes of mechanical ventilation. We did not mandate sedative type or dose. Initiation of neuromuscular blockade began within 4 hours of randomization.
6. We allowed an open-label intravenous bolus injection of 20 mg of cisatracurium in both groups if the end-inspiratory plateau pressure remained greater than 30 cm of water for at least 10 minutes despite the administration of increasing doses of sedatives and decreasing the tidal volume and PEEP. If the neuromuscular blockade reduced the end-inspiratory plateau pressure by less than 2 cmH<sub>2</sub>O, the protocol recommended a second 20 mg bolus of cisatracurium. If after the initial bolus, the end-inspiratory plateau pressure did not decrease by at least 2 cmH<sub>2</sub>O, the protocol recommended that a bolus injection of cisatracurium should not be administered again during the following 24-hour period.
7. In the control group and in the intervention group after neuromuscular blockade had been withdrawn, light sedation targets were a RASS score of 0 to -1, a Riker score of 3 to 4, or a Ramsay score of 2-3.



### Additional outcome measures

Intensive Care Unit (ICU)-acquired weakness was defined as a Medical Research Council (MRC) score of <48 (or mean MRC <4 when at least 7 of the 12 muscle group were tested).<sup>4</sup>

In addition, the following long-term outcome measures were obtained: a.) disability using Katz Activities of Daily Living (ADL)/Lawton Instrumental Activities of Daily Living Scale (IADL) plus two additional Nagi items, b.) health-related quality of life using the EuroQol (EQ-5D-5L), c.) self-rated health, d.) pain interference, e.) post-traumatic stress-like symptoms using the Post-Traumatic Stress Symptoms (PTSS<sub>14</sub>), f.) cognitive function using the Montreal Cognitive Assessment (MoCA-Blind) or, via proxy, the Alzheimer's Disease 8 (AD8) questionnaire, g.) ability to return to work, h.) subsequent hospital and emergency department use, and i.) location of residence.<sup>5-9</sup>

To avoid delay in publication of the primary results, we chose not to measure serum interleukin 6 concentrations, an additional outcome specified in the study protocol, before submission of this manuscript.

## Supplementary figures

**Figure S1.** PaO<sub>2</sub>/FiO<sub>2</sub> ratios and PEEP levels during the first week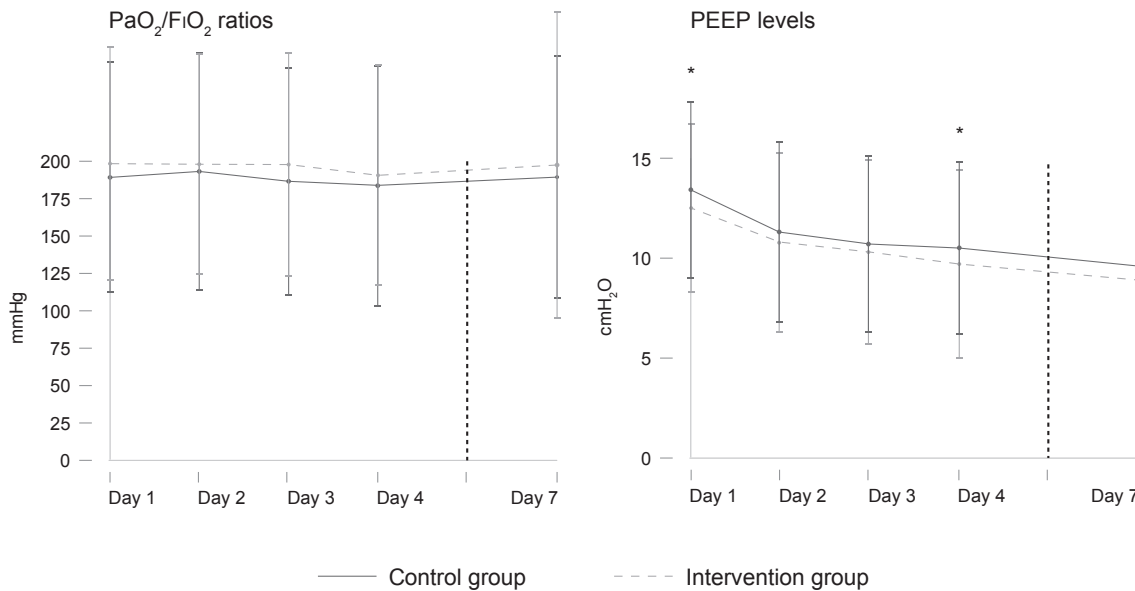

Data displayed as means  $\pm$  standard deviations. PaO<sub>2</sub> denotes partial pressure of arterial oxygen, FiO<sub>2</sub> denotes the fraction of inspired oxygen, PaO<sub>2</sub>/FiO<sub>2</sub> ratios expressed as mmHg, PEEP denotes positive end-expiratory pressure and expressed as cmH<sub>2</sub>O. Left panel: there were no differences in daily PaO<sub>2</sub>/FiO<sub>2</sub> ratios between the intervention and control groups. Right panel: there were differences in PEEP levels between the intervention and control groups on days 1 and 4. Day 1 difference and 95% CI: -0.95 (-1.50, -0.41) and day 4 difference and 95% CI: -0.81 (-1.47, -0.15). See Table S5 for more details.

**Figure S2.** Survival curves for the subgroups, PaO<sub>2</sub>/FIO<sub>2</sub> <120 and ≥120 mmHg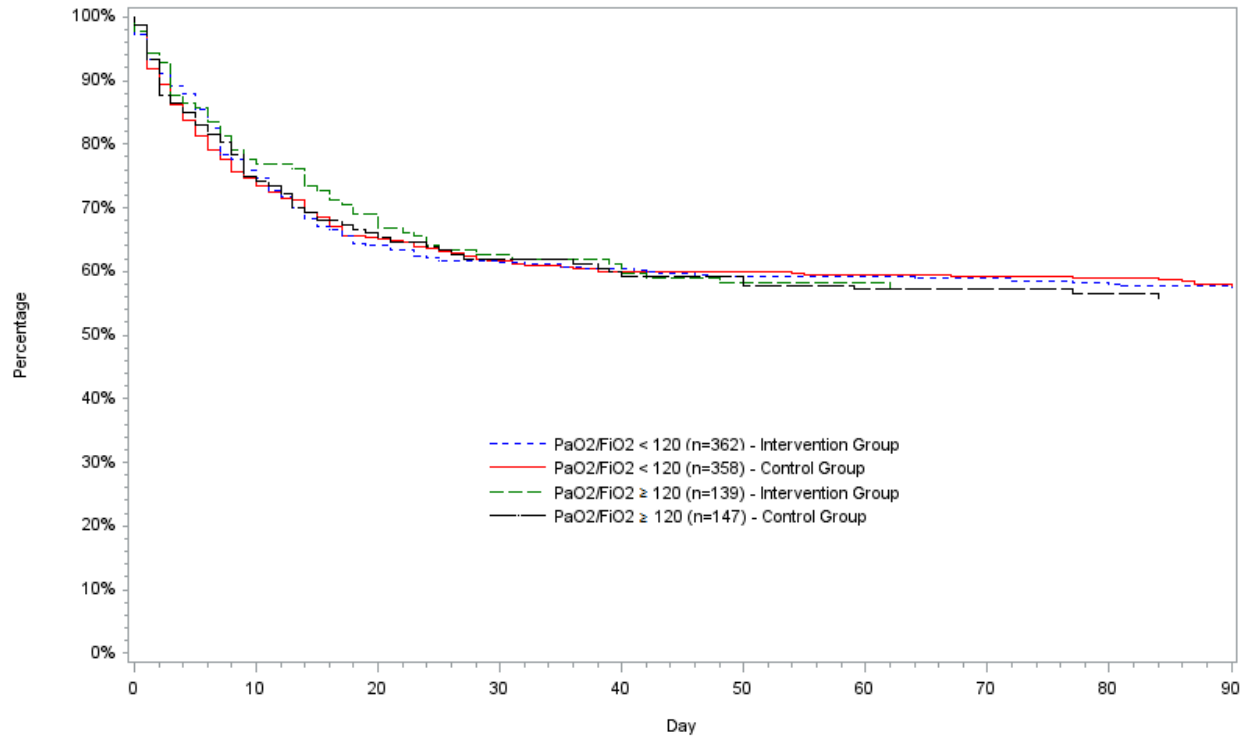

PaO<sub>2</sub> denotes partial pressure of arterial oxygen, FIO<sub>2</sub> denotes the fraction of inspired oxygen, and PaO<sub>2</sub>/FIO<sub>2</sub> ratios expressed as mmHg. Data generated from Kaplan-Meier survival analysis, defining death as deaths occurring in-hospital, as per the primary outcome definition (see Methods). The cutoff values of <120 and ≥120 mmHg were pre-specified, based on a similar subgroup analysis in the ACURASYS study.<sup>10</sup> There was no interaction between treatment assignment and subgroup ( $p=0.76$ , see Table Sg).

## Supplementary tables

**Table S1. Additional baseline characteristics**

| Characteristic                         | Intervention (N=501) | Control (N=505)     |
|----------------------------------------|----------------------|---------------------|
| Black- no. (%)                         | 63 (12.6)            | 79 (15.6)           |
| Hispanic or Latino- no. (%)            | 64 (12.8)            | 54 (10.7)           |
| PaCO <sub>2</sub> - mm Hg              | 44.1 ± 10.2 (n=470)  | 43.8 ± 12.0 (n=474) |
| Minute ventilation - L/min             | 11.3 ± 3.2 (n=469)   | 11.3 ± 3.7 (n=468)  |
| Medical ICU - no. (%)                  | 327 (65.3)           | 352 (69.7)          |
| Primary cause of lung injury - no. (%) |                      |                     |
| Trauma                                 | 16 (3.2)             | 23 (4.6)            |
| Multiple transfusion                   | 13 (2.6)             | 7 (1.4)             |

Plus-minus values are means ± SD with (no.). Race and ethnicity was assigned by the coordinators on the basis of hospital records or information from the next of kin. PaCO<sub>2</sub> denotes the partial pressure of arterial carbon dioxide. ICU denotes intensive care unit.

**Table S2. Comparison of patients enrolled by a qualifying PaO<sub>2</sub>/FiO<sub>2</sub> ratio or SpO<sub>2</sub>/ FiO<sub>2</sub> ratios**

| Characteristic                                                                            | Intervention (N=501) | Control (N=505)     |
|-------------------------------------------------------------------------------------------|----------------------|---------------------|
| Qualifying PaO <sub>2</sub> /FiO <sub>2</sub> (mmHg)                                      | 98.7 ± 27.9 (n=452)  | 99.5 ± 27.9 (n=460) |
| Imputed PaO <sub>2</sub> /FiO <sub>2</sub> from SpO <sub>2</sub> /FiO <sub>2</sub> (mmHg) | 94.8 ± 26.7 (n=49)   | 93.2 ± 28.9 (n=45)  |
| PEEP at time of qualifying PaO <sub>2</sub> /FiO <sub>2</sub> (cmH <sub>2</sub> O)        | 11.3 ± 3.2 (n=452)   | 11.3 ± 3.5 (n=460)  |
| PEEP at time of qualifying SpO <sub>2</sub> /FiO <sub>2</sub> (cmH <sub>2</sub> O)        | 10.7 ± 2.9 (n=49)    | 9.8 ± 2.0 (n=45)    |

Plus-minus values are means ± SD with (no.). PaO<sub>2</sub> denotes partial pressure of arterial oxygen, FiO<sub>2</sub> denotes the fraction of inspired oxygen, SpO<sub>2</sub> denotes arterial oxygen saturation, and PEEP denotes positive end-expiratory pressure. Please see Supplementary Methods (page 5) and Study Protocol (page 44) for more information concerning the imputed PaO<sub>2</sub>/FiO<sub>2</sub> calculations.

**Table S3. Cisatracurium drug dosing information**

| Characteristic                                        | Intervention (N=501)   | Control (N=505)      | Difference (95% CI) |
|-------------------------------------------------------|------------------------|----------------------|---------------------|
| Vasopressor adjustment during first 6 hours - no. (%) | 230 (45.9)             | 185 (36.6)           | 9.3% (3.2, 15.3)    |
| Fluid bolus during first 6 hours - no. (%)            | 82 (16.4)              | 74 (14.7)            | 1.7% (-2.8, 6.2)    |
| Either of the above 2 interventions - no. (%)         | 254 (50.7)             | 214 (42.4)           | 8.3% (2.2, 14.5)    |
| Had loading dose * - no. (%)                          | 478 (95.4)             | -                    | -                   |
| Had infusion started * - no. (%)                      | 488 (97.4)             | -                    | -                   |
| Additional bolus given - no. (%)                      | 15 (3.3) (n=456)       | -                    | -                   |
| Number of additional boluses                          | 1.4 ± 0.8 (n=15)       | -                    | -                   |
| Additional cisatracurium by bolus - mg                | 27.7 ± 16.4 (n=15)     | -                    | -                   |
| Completed 48-hour Infusion ◊ - no. (%)                | 336 (74.5) (n=451)     | -                    | -                   |
| Actual infusion time † ≥48.5 hours - no. (%)          | 9 (2.0) (n=451)        | -                    | -                   |
| Infusion held - no. (%)                               | 18 (4.0) (n=456)       | -                    | -                   |
| Hold hours                                            | 6.4 ± 7.1 (n=18)       | -                    | -                   |
| Infusion rate increased - no. (%)                     | 4 (0.9) (n=456)        | -                    | -                   |
| Maximum increased infusion rate - mg/hour             | 44.1 ± 7.5 (n=4)       | -                    | -                   |
| Other NMB first 48 hours - no. (%)                    | 4 (0.9) (n=456)        | 86 (17.0) (n=505)    | -                   |
| Volume of other NMB first 48 hours - mg               | 83.4 ± 80.2 (n=4)      | 173.3 ± 285.3 (n=86) | -                   |
| Any NMB second 48 hours - no. (%)                     | 73 (16.0) (n=456)      | 40 (7.9) (n=505)     | -                   |
| Any NMB second 48 hours - mg                          | 522.3 ± 536.2 (n=73)   | 355.8 ± 494.9 (n=40) | -                   |
| Any NMB after 2nd 48 hours - no. (%)                  | 58 (12.7) (n=456)      | 57 (11.3)            | -                   |
| Total cisatracurium during first 48 hours - mg        | 1806.9 ± 108.1 (n=451) | -                    | -                   |
| Cisatracurium stopped early - no. yes (% yes)         | 185 (45.7) (n=405)     | -                    | -                   |
| Reason for early cisatracurium stopping - no. (%)     | (n=185)                | -                    | -                   |
| Met stopping allowance criteria                       | 74 (40.0)              | -                    | -                   |
| Dose completed                                        | 48 (25.9)              | -                    | -                   |
| Death                                                 | 27 (14.6)              | -                    | -                   |
| Other                                                 | 20 (10.8)              | -                    | -                   |
| Unintentional early stop                              | 13 (7.0)               | -                    | -                   |
| Adverse event                                         | 3 (1.6)                | -                    | -                   |

Plus-minus values are means ± SD. NMB denotes neuromuscular blockade.

\* Tabulation among patients who were randomized to the NMB arm

◊ Actual infusion time >45.6 hours

† Actual infusion time = infusion stop time - start time - hold duration

**Table S4.** Daily 'on study' sedation parameters from baseline through study day 7

| Study day | Richmond Agitation-Sedation Score |                  |                     | Riker Sedation Agitation Scale |                |                     |
|-----------|-----------------------------------|------------------|---------------------|--------------------------------|----------------|---------------------|
|           | Intervention                      | Control          | Difference (95% CI) | Intervention                   | Control        | Difference (95% CI) |
| Baseline  | -3.2 ± 7.0 (407)                  | -2.6 ± 1.8 (406) | -                   | 2.3 ± 1.1 (79)                 | 2.4 ± 1.1 (79) | -                   |
| Day 1     | -4.8 ± 0.8 (395)                  | -2.7 ± 1.9 (402) | -2.1 (-2.3, -1.9)   | 1.1 ± 0.4 (76)                 | 2.4 ± 1.3 (73) | -1.3 (-1.6, -1.0)   |
| Day 2     | -4.6 ± 5.1 (376)                  | -2.3 ± 2.0 (372) | -2.3 (-2.9, -1.8)   | 1.3 ± 0.9 (75)                 | 2.7 ± 1.3 (70) | -1.4 (-1.8, -1.1)   |
| Day 3     | -2.9 ± 2.0 (361)                  | -2.2 ± 2.0 (349) | -0.7 (-1.0, -0.4)   | 2.4 ± 1.3 (68)                 | 2.9 ± 1.3 (65) | -0.5 (-1.0, -0.1)   |
| Day 4     | -2.7 ± 5.6 (341)                  | -2.0 ± 2.0 (332) | -0.7 (-1.4, -0.1)   | 2.9 ± 1.3 (60)                 | 2.8 ± 1.3 (62) | 0.0 (-0.4, 0.5)     |
| Day 5     | -2.2 ± 2.0 (326)                  | -1.8 ± 2.0 (310) | -0.4 (-0.7, -0.1)   | 2.9 ± 1.3 (59)                 | 2.9 ± 1.2 (57) | 0.0 (-0.5, 0.5)     |
| Day 6     | -2.0 ± 2.0 (302)                  | -1.6 ± 2.0 (291) | -0.5 (-0.8, -0.2)   | 1.0 ± 13.9 (54)                | 3.1 ± 1.2 (51) | -2.1 (-6.0, 1.8)    |
| Day 7     | -1.6 ± 2.1 (280)                  | -1.5 ± 1.9 (257) | -0.1 (-0.4, 0.3)    | 3.3 ± 1.5 (46)                 | 3.1 ± 1.5 (50) | 0.2 (-0.4, 0.8)     |

Plus-minus values are means ± SD with (no).

Richmond Agitation-Sedation Score with a range: +4 (combative) to -5 (unarousable), where 0 equals alert and calm.<sup>1</sup> Riker Sedation Agitation Scale with a range: 1 (unarousable) to 7 (dangerous agitation), where 4 equals calm and cooperative.<sup>2</sup> Only 2 patients were managed with the Ramsay scale.

**Table S5. Ventilator and patient physiological parameters over time**

| Criteria                             | Baseline              |                                    | Day 1                 |                                     | Day 2                 |                                     | Day 3                 |                                      | Day 4                 |                                    | Day 7                  |                       |
|--------------------------------------|-----------------------|------------------------------------|-----------------------|-------------------------------------|-----------------------|-------------------------------------|-----------------------|--------------------------------------|-----------------------|------------------------------------|------------------------|-----------------------|
|                                      | Intervention          | Control                            | Intervention          | Control                             | Intervention          | Control                             | Intervention          | Control                              | Intervention          | Control                            | Intervention           | Control               |
| Tidal volume *                       | 6.3 ± 0.9<br>(445)    | 6.3 ± 0.9<br>(443)                 | 5.9 ± 0.8<br>(457)    | 5.9 ± 0.7<br>(428)                  | 5.9 ± 0.8<br>(425)    | 6.0 ± 0.8<br>(377)                  | 5.9 ± 0.8<br>(366)    | 6.0 ± 0.8<br>(303)                   | 6.0 ± 0.9<br>(304)    | 6.0 ± 0.7<br>(262)                 | 6.1 ± 0.8<br>(164)     | 6.1 ± 0.9<br>(148)    |
| Set rate $\diamond$                  | 23.8 ± 6.4<br>(485)   | 24.5 ± 6.7<br>(486)                | 27.3 ± 6.3<br>(479)   | 26.3 <sup>I</sup> ± 6.6<br>(464)    | 27.0 ± 6.2<br>(448)   | 25.6 <sup>II</sup> ± 6.7<br>(405)   | 26.2 ± 6.8<br>(389)   | 25.2 ± 6.8<br>(335)                  | 25.0 ± 6.7<br>(334)   | 25.1 ± 6.8<br>(295)                | 23.2 ± 6.9<br>(193)    | 23.7 ± 6.9<br>(175)   |
| Total rate $\diamond$                | 26.7 ± 6.4<br>(488)   | 27.6 <sup>III</sup> ± 6.6<br>(488) | 27.5 ± 6.2<br>(479)   | 28.3 ± 6.3<br>(475)                 | 27.1 ± 6.2<br>(456)   | 27.7 ± 6.7<br>(430)                 | 27.0 ± 7.2<br>(423)   | 27.1 ± 7.1<br>(375)                  | 27.0 ± 7.0<br>(383)   | 27.5 ± 7.0<br>(330)                | 26.5 ± 7.5<br>(263)    | 26.8 ± 7.2<br>(222)   |
| Total MV †                           | 11.3 ± 3.2<br>(469)   | 11.3 ± 3.7<br>(468)                | 10.4 ± 3.4<br>(469)   | 11.1 <sup>IV</sup> ± 3.6<br>(467)   | 10.1 ± 2.7<br>(450)   | 10.9 <sup>V</sup> ± 3.4<br>(423)    | 10.4 ± 3.1<br>(415)   | 10.9 ± 4.2<br>(362)                  | 10.8 ± 3.4<br>(376)   | 10.8 ± 3.1<br>(318)                | 11.3 ± 3.6<br>(258)    | 11.0 ± 3.5<br>(217)   |
| Set PEEP ‡                           | 12.6 ± 3.6<br>(492)   | 12.5 ± 3.6<br>(495)                | 12.5 ± 4.4<br>(480)   | 13.4 <sup>VI</sup> ± 4.2<br>(480)   | 10.8 ± 4.5<br>(456)   | 11.3 ± 4.5<br>(434)                 | 10.3 ± 4.4<br>(424)   | 10.7 ± 4.6<br>(374)                  | 9.7 ± 4.3<br>(384)    | 10.5 <sup>VII</sup> ± 4.7<br>(332) | 8.9 ± 4.2<br>(265)     | 9.6 ± 4.4<br>(223)    |
| P <sub>IP</sub> ‡                    | 29.7 ± 8.5<br>(418)   | 30.4 ± 9.2<br>(427)                | 30.3 ± 6.8<br>(453)   | 31.1 ± 7.9<br>(425)                 | 29.6 ± 7.4<br>(420)   | 29.9 ± 8.5<br>(377)                 | 28.9 ± 7.7<br>(363)   | 28.5 ± 8.5<br>(303)                  | 27.4 ± 7.8<br>(303)   | 28.5 ± 8.1<br>(262)                | 26.3 ± 8.5<br>(161)    | 28.0 ± 7.7<br>(149)   |
| Plateau pressure ‡                   | 25.5 ± 6.0<br>(274)   | 25.7 ± 6.1<br>(266)                | 25.2 ± 5.2<br>(382)   | 25.6 ± 5.6<br>(331)                 | 24.3 ± 5.5<br>(348)   | 24.4 ± 6.3<br>(297)                 | 23.6 ± 5.3<br>(282)   | 24.8 <sup>VIII</sup> ± 6.0<br>(221)  | 23.3 ± 5.1<br>(223)   | 24.3 ± 6.1<br>(184)                | 22.3 ± 6.3<br>(103)    | 24.0 ± 5.7<br>(93)    |
| Driving pressure ‡                   | 12.7 ± 5.8<br>(274)   | 13.1 ± 5.9<br>(266)                | 12.8 ± 4.1<br>(382)   | 12.1 <sup>IX</sup> ± 4.6<br>(331)   | 13.4 ± 4.2<br>(348)   | 12.6 <sup>X</sup> ± 5.0<br>(297)    | 12.7 ± 4.6<br>(282)   | 13.4 ± 4.7<br>(221)                  | 12.9 ± 4.7<br>(223)   | 12.8 ± 4.6<br>(184)                | 12.4 ± 5.9<br>(103)    | 13.2 ± 5.7<br>(93)    |
| FiO <sub>2</sub>                     | 0.80 ± 0.2<br>(489)   | 0.80 ± 0.2<br>(474)                | 0.49 ± 0.14<br>(436)  | 0.53 <sup>XI</sup> ± 0.17<br>(408)  | 0.45 ± 0.13<br>(381)  | 0.49 <sup>XII</sup> ± 0.16<br>(348) | 0.47 ± 0.15<br>(331)  | 0.51 <sup>XIII</sup> ± 0.17<br>(273) | 0.47 ± 0.15<br>(291)  | 0.50 ± 0.16<br>(250)               | 0.48 ± 0.16<br>(188)   | 0.50 ± 0.17<br>(173)  |
| pH                                   | 7.32 ± 0.10<br>(470)  | 7.32 ± 0.10<br>(474)               | 7.32 ± 0.10<br>(437)  | 7.33 ± 0.10<br>(409)                | 7.35 ± 0.08<br>(381)  | 7.36 ± 0.09<br>(348)                | 7.37 ± 0.08<br>(330)  | 7.37 ± 0.08<br>(277)                 | 7.39 ± 0.08<br>(292)  | 7.39 ± 0.08<br>(252)               | 7.40 ± 0.10<br>(191)   | 7.41 ± 0.09<br>(178)  |
| PaO <sub>2</sub> §                   | 81.9 ± 24.7<br>(470)  | 82.4 ± 24.7<br>(474)               | 89.0 ± 30.7<br>(437)  | 92.0 ± 35.3<br>(409)                | 83.1 ± 27.2<br>(381)  | 86.5 ± 30.9<br>(348)                | 85.2 ± 26.9<br>(330)  | 85.4 ± 33.6<br>(277)                 | 82.6 ± 27.8<br>(292)  | 82.7 ± 26.3<br>(251)               | 84.5 ± 30.4<br>(191)   | 86.5 ± 35.5<br>(178)  |
| PaCO <sub>2</sub> §                  | 44.1 ± 10.2<br>(470)  | 43.8 ± 12.0<br>(474)               | 46.5 ± 11.7<br>(437)  | 43.4 <sup>XIV</sup> ± 10.6<br>(409) | 45.6 ± 11.3<br>(381)  | 44.5 ± 12.3<br>(348)                | 45.0 ± 9.9<br>(330)   | 44.6 ± 11.4<br>(277)                 | 43.9 ± 9.7<br>(292)   | 44.6 ± 10.4<br>(252)               | 43.7 ± 11.1<br>(191)   | 45.3 ± 11.7<br>(178)  |
| PaO <sub>2</sub> /FiO <sub>2</sub> ^ | 116.1 ± 38.3<br>(469) | 115.8 ± 40.1<br>(474)              | 198.4 ± 77.7<br>(436) | 189.2 ± 76.8<br>(408)               | 198.0 ± 73.4<br>(381) | 193.2 ± 79.0<br>(348)               | 197.8 ± 74.6<br>(330) | 186.6 ± 75.6<br>(272)                | 190.6 ± 73.5<br>(289) | 183.9 ± 80.0<br>(248)              | 197.5 ± 102.0<br>(188) | 189.4 ± 80.6<br>(173) |
| OI "                                 | 17.2 ± 8.8<br>(425)   | 17.3 ± 10.0<br>(425)               | 10.8 ± 6.2<br>(420)   | 11.8 <sup>XV</sup> ± 6.7<br>(382)   | 9.9 ± 5.9<br>(365)    | 10.8 ± 6.8<br>(328)                 | 9.7 ± 6.3<br>(309)    | 10.9 <sup>XVI</sup> ± 6.9<br>(247)   | 10.0 ± 7.1<br>(265)   | 11.2 ± 7.9<br>(222)                | 9.4 ± 7.2<br>(155)     | 10.0 ± 6.5<br>(135)   |

Plus-minus values are means ± SD with (no). PEEP denotes positive end-expiratory pressure, P<sub>IP</sub> denotes peak inspiratory pressure, FiO<sub>2</sub> denotes the fraction of inspired oxygen, PaO<sub>2</sub> denotes partial pressure of arterial oxygen, and PaCO<sub>2</sub> denotes the partial pressure of arterial carbon dioxide.

\* measured in mL/kg,  $\diamond$  measured in breaths/min, † MV denotes minute ventilation measured in L/min, ‡ cmH<sub>2</sub>O, § measured in mmHg, ^ measured in mmHg, " OI denotes oxygenation index, which equals FiO<sub>2</sub> x mean airway pressure (cmH<sub>2</sub>O) / PaO<sub>2</sub> (mmHg).

Differences with 95% CI: **I** 1.06 (0.24, 1.89), **II** 1.40 (0.53, 2.26), **III** -0.83 (-1.65, -0.01), **IV** -0.66 (-1.11, -0.22), **V** -0.76 (-1.16, -0.35), **VI** -0.95 (-1.50, -0.41), **VII** -0.81 (-1.47, -0.15), **VIII** -1.25 (-2.25, -0.26), **IX** 0.68 (0.04, 1.31), **X** 0.78 (0.07, 1.49), **XI** -0.04 (-0.06, -0.02), **XII** -0.04 (-0.06, -0.02), **XIII** -0.03 (-0.05, 0.00), **XIV** 3.14 (1.63, 4.64), **XV** -1.00 (-1.90, -0.11), **XVI** -1.19 (1.230, -0.09).

**Table S6. Improvement in PaO<sub>2</sub>/FiO<sub>2</sub> stratified by median duration of ARDS prior to randomization**

| Group               | Median time | Proportion with PaO <sub>2</sub> /FiO <sub>2</sub> ratio ≥300 mmHg |              |                 |              |
|---------------------|-------------|--------------------------------------------------------------------|--------------|-----------------|--------------|
|                     |             | Day 1                                                              |              | Day 2           |              |
|                     |             | Intervention                                                       | Control      | Intervention    | Control      |
| #1 (N=503)          | 3.7 hours   | 13% (27/210)                                                       | 9% (20/222)  | 8% (15/182)     | 12% (22/185) |
| #2 (N=503)          | 15.6 hours  | 8% (17/226)                                                        | 10% (18/186) | 9% (17/199)     | 10% (16/163) |
| Difference (95% CI) |             | 6% (-2% to 14%)                                                    |              | 2% (-11% to 6%) |              |

Percentage (N/available records). PaO<sub>2</sub> denotes partial pressure of arterial oxygen, FiO<sub>2</sub> denotes the fraction of inspired oxygen. The groups were stratified by the median time for the entire cohort (7.6 hours) from first documentation of moderate-to-severe ARDS until randomization.

**Table S7. Compliance with the study protocol high PEEP/FiO<sub>2</sub> table**

| Study day | Overall         | Intervention    | Control         | Difference (95% CI)  |
|-----------|-----------------|-----------------|-----------------|----------------------|
| Day 1     | 76.9% (738/960) | 79.8% (383/480) | 74.0% (355/480) | 5.8% (0.5%, 11.2%)   |
| Day 2     | 79.9% (711/890) | 83.1% (379/456) | 76.5% (332/434) | 6.6% (1.3%, 11.9%)   |
| Day 3     | 75.9% (606/798) | 76.9% (326/424) | 74.9% (280/374) | 2.0% (-3.9%, 8.0%)   |
| Day 4     | 73.7% (528/716) | 71.9% (276/384) | 75.9% (252/332) | -4.0% (-10.5%, 2.4%) |
| Day 7     | 64.5% (315/488) | 63.4% (168/265) | 65.9% (147/223) | -2.5% (-11.0%, 6.0%) |

Percent (N/available records). PEEP denotes positive end-expiratory pressure, FiO<sub>2</sub> denotes the fraction of inspired oxygen. The full PEEP/FiO<sub>2</sub> table is on page 51 of the study protocol. Values represent combinations of FiO<sub>2</sub> and PEEP within 'in table' recommendations, as per study protocol, with specified exceptions to the PEEP table allowed for lower PEEP.



**Table S8.** Additional measures of 'on protocol' compliance

| Measure                                         | Overall                     | Intervention (N=501)        | Control (N=505)             | Difference (95% CI) |
|-------------------------------------------------|-----------------------------|-----------------------------|-----------------------------|---------------------|
| On target tidal volume * - % (No.)              |                             |                             |                             |                     |
| Day 1                                           |                             | 88.2 (n=457)                | 86.7 (n=428)                | 1.5 (-2.9, 5.9)     |
| Day 2                                           |                             | 88.5 (n=425)                | 85.9 (n=377)                | 2.5 (-2.1, 7.2)     |
| Day 3                                           |                             | 88.0 (n=366)                | 83.5 (n=303)                | 4.5 (-0.9, 9.8)     |
| Day 4                                           |                             | 83.6 (n=304)                | 83.6 (n=262)                | -0.0 (-6.2, 6.1)    |
| Day 7                                           |                             | 81.7 (n=164)                | 78.4 (n=148)                | 3.3 (-5.6, 12.2)    |
| On target plateau pressure $\diamond$ - % (No.) |                             |                             |                             |                     |
| Day 1                                           |                             | 87.4 (n=382)                | 83.4 (n=331)                | 4.1 (-1.2, 9.3)     |
| Day 2                                           |                             | 89.1 (n=348)                | 84.8 (n=297)                | 4.2 (-1.0, 9.5)     |
| Day 3                                           |                             | 91.5 (n=282)                | 86.4 (n=221)                | 5.1 (-0.5, 10.6)    |
| Day 4                                           |                             | 92.8 (n=223)                | 85.9 (n=184)                | 7.0 (0.9, 13.0)     |
| Day 7                                           |                             | 92.2 (n=113)                | 89.2 (n=93)                 | 3.0 (-5.2, 11.1)    |
| Fluid balance - mL (No.)                        |                             |                             |                             |                     |
| Day 1                                           | 1136 [-109 - 2487] (n=964)  | 1310 [65-2716] (n=478)      | 956 [-208-2315] (n=486)     | 273 (-26, 572)      |
| Day 2                                           | 327 [-951 - 1456] (n=918)   | 377 [-786 - 1532] (n=461)   | 304 [-1029 - 1383] (n=457)  | 116 (-153, 388)     |
| Day 3                                           | -242 [-1432 - 728] (n=889)  | -355 [-1478 - 700] (n=452)  | -169 [-1353 - 810] (n=537)  | -81 (-368, 206)     |
| Day 4                                           | -455 [-1539 - 620] (n=858)  | -576 [-1701 - 428] (n=438)  | -214 [-1387 - 970] (n=420)  | -369 (-623, -116)   |
| Day 7                                           | -301 [-1359 - 561] (n=736)  | -330 [-1395 - 532] (n=375)  | -274 [-1270 - 590] (n=361)  | 13 (-236., 262)     |
| Cumulative fluid balance - mL (No.)             |                             |                             |                             |                     |
| Day 1                                           | 2712 [611 - 5206] (n=970)   | 2678 [835 - 5569] (n=482)   | 2795 [365-4866] (n=488)     | 360 (-219, 939)     |
| Day 2                                           | 2984 [-110 - 6206] (n=924)  | 3133 [33 - 6691] (n=463)    | 2741 [-319 - 5759] (n=461)  | 445 (-270, 1161)    |
| Day 3                                           | 2260 [-1289 - 6255] (n=897) | 2533 [-1074 - 6892] (n=455) | 2014 [-1406 - 5768] (n=442) | 482 (-362, 1326)    |
| Day 4                                           | 1795 [-2103 - 6182] (n=872) | 1804 [-2132 - 5992] (n=442) | 1751 [-2083 - 6629] (n=430) | 7 (-847, 1006)      |
| Day 7                                           | 198 [-4389 - 5261] (n=778)  | 168 [-4297 - 5017] (n=395)  | 231 [-4568 - 5790] (n=383)  | -33 (-1173, 1106)   |

Reported as median and interquartile range, with number.

\* Target tidal volume defined as <6.5 mL/kg ideal body weight.

$\diamond$  Target plateau pressure defined as <30 cmH<sub>2</sub>O.

**Table S9.** Day go mortality percentage stratified by PaO<sub>2</sub>/FiO<sub>2</sub> ratio

| PaO <sub>2</sub> /FiO <sub>2</sub> ratio             | Intervention     | Control          | Difference (95% CI) | P-value |
|------------------------------------------------------|------------------|------------------|---------------------|---------|
| PaO <sub>2</sub> /FiO <sub>2</sub> <120 mmHg (N=720) | 42.5 ± 2.6 (362) | 42.2 ± 2.6 (358) | 0.4 (-6.9, 7.6)     |         |
| PaO <sub>2</sub> /FiO <sub>2</sub> ≥120 mmHg (N=286) | 42.4 ± 4.2 (139) | 44.2 ± 4.1 (147) | -1.8 (-13.3, 9.7)   |         |
| Interaction                                          |                  |                  | 2.1 (-11.4, 15.7)   | 0.76    |

Mortality percentage - (# of patients who died/# of patients enrolled) × 100 ± StdErr (no.). P-value calculated from Wald test.

**Table S10.** Day go mortality percentage stratified by duration of ARDS prior to randomization

| ARDS to randomization time | Intervention     | Control          | Difference (95% CI) | P-value |
|----------------------------|------------------|------------------|---------------------|---------|
| < median (N=503)           | 40.5 ± 3.2 (232) | 44.6 ± 3.0 (271) | -4.1 (-12.8, 4.5)   |         |
| > median (N=503)           | 44.2 ± 3.0 (269) | 40.6 ± 3.2 (234) | 3.6 (-5.0, 12.3)    |         |
| Interaction                |                  |                  | -7.8 (-20.0, 4.5)   | 0.21    |

Time measured from first documentation of moderate-to-severe ARDS until randomization. The overall median time was 7.6 hours. The median time for the cohort above the median was 15.6 hours, and that for those below the median was 3.7 hours. Mortality percentage - (# of patients who died/# of patients enrolled) × 100 ± StdErr (no.). P-value is calculated from Wald test.

**Table S11.** Day go mortality percentage stratified by hospital tercile for prior NMB use

| Tercile                   | # hospitals; patients | Exclusion rate | Intervention     | Control          | Difference (95% CI) |
|---------------------------|-----------------------|----------------|------------------|------------------|---------------------|
| #1                        | 16; 443               | 9.2%           | 38.1 ± 3.3 (223) | 40.0 ± 3.3 (220) | -1.9 (-11.0, 7.2)   |
| #2                        | 16; 375               | 25.7%          | 50.3 ± 3.7 (185) | 45.8 ± 3.6 (190) | 0.045 (-5.6, 14.6)  |
| #3                        | 16; 188               | 61.1%          | 37.6 ± 5.0 (93)  | 43.2 ± 5.1 (95)  | -5.5 (-19.5, 8.5)   |
| Interaction P-Value: 0.47 |                       |                |                  |                  |                     |

NMB denotes neuromuscular blockade. Mortality percentage - (# of patients who died/# of patients enrolled) × 100 ± StdErr (no.). P-value is calculated from Wald test. Exclusion rate is the summed rate of patients excluded for prior NMB use/enrolled plus excluded for prior NMB use, weighted by sites' enrollment numbers.

**Table S12.** Day go mortality percentage estimates stratified by gender

| Characteristic | Intervention     | Control          | Difference (95% CI) | P-value |
|----------------|------------------|------------------|---------------------|---------|
| Male (N=560)   | 42.6 ± 2.9 (291) | 44.2 ± 3.0 (269) | -1.6 (-9.8, 6.6)    |         |
| Female (N=446) | 42.4 ± 3.4 (210) | 41.1 ± 3.2 (236) | 1.3 (-7.9, 10.4)    |         |
| Interaction    |                  |                  | -2.9 (-15.2, 9.4)   | 0.644   |

Mortality percentage - (# of patients who died/# of patients enrolled) × 100 ± StdErr (no.). P-value is calculated from Wald test.

**Table S13.** Day go mortality percentage estimates stratified by race

| Characteristic    | Intervention     | Control          | Difference (95% CI) | P-value |
|-------------------|------------------|------------------|---------------------|---------|
| Non-White (N=168) | 47.4 ± 5.7 (76)  | 38.0 ± 5.1 (92)  | 9.3 (-5.7, 24.3)    |         |
| White (N=705)     | 41.6 ± 2.6 (361) | 43.3 ± 2.7 (344) | -1.8 (-9.1, 5.5)    |         |
| Interaction       |                  |                  | 11.1 (-5.6, 27.8)   | 0.192   |

Mortality percentage - (# of patients who died/# of patients enrolled) × 100 ± StdErr (no.). P-value is calculated from Wald test.

**Table S14.** Day 90 mortality percentage estimates stratified by ethnicity

| Characteristic                 | Intervention     | Control          | Difference (95% CI) | P-value |
|--------------------------------|------------------|------------------|---------------------|---------|
| Hispanic or Latino (N=118)     | 32.8 ± 5.9 (64)  | 53.7 ± 6.8 (54)  | -20.9 (-38.5, -3.3) |         |
| Not Hispanic or Latino (N=831) | 44.6 ± 2.5 (410) | 42.0 ± 2.4 (421) | 2.6 (-4.1, 9.3)     |         |
| Interaction                    |                  |                  | -23.5 (-42.3, -4.7) | 0.015   |

Mortality percentage - (# of patients who died/# of patients enrolled) x 100 ± StdErr (no.). P-value is calculated from Wald test.

**Table S15.** Day 90 mortality percentage stratified by hospital tercile for MD study refusal

| Tercile                   | # hospitals; patients | Exclusion rate | Intervention     | Control          | Difference (95% CI) |
|---------------------------|-----------------------|----------------|------------------|------------------|---------------------|
| #1                        | 16; 279               | 1.4%           | 41.7 ± 4.2 (139) | 42.1 ± 4.2 (140) | -0.4 (-12.0, 11.2)  |
| #2                        | 16; 500               | 10.9%          | 42.0 ± 3.1 (250) | 41.6 ± 3.1 (250) | 0.4 (-8.2, 9.0)     |
| #3                        | 16; 227               | 45.2%          | 44.6 ± 4.7 (112) | 46.1 ± 4.6 (115) | -1.4 (-14.4, 11.5)  |
| Interaction P-Value: 0.97 |                       |                |                  |                  |                     |

Mortality percentage - (# of patients who died/# of patients enrolled) x 100 ± StdErr (no.). P-value is calculated from Wald test. Exclusion rate is the summed rate of patients excluded for MD refusal/enrolled plus excluded for MD refusal, weighted by sites' enrollment numbers.

**Table S16. Sequential Organ Failure Assessment (SOFA) scores**

|                                                              | SOFA score      |                 |                     | Change in SOFA score from baseline |                  |                     |
|--------------------------------------------------------------|-----------------|-----------------|---------------------|------------------------------------|------------------|---------------------|
|                                                              | Intervention    | Control         | Difference (95% CI) | Intervention                       | Control          | Difference (95% CI) |
| <b>Coagulation</b>                                           |                 |                 |                     |                                    |                  |                     |
| Baseline                                                     | 0.9 ± 1.2 (488) | 0.9 ± 1.2 (496) | -                   | -                                  | -                | -                   |
| Day 1                                                        | 1.0 ± 1.2 (468) | 0.9 ± 1.2 (464) | 0.1 (-0.1, 0.3)     | 0.1 ± 0.8 (468)                    | 0.1 ± 0.8 (463)  | 0.0 (-0.1, 0.1)     |
| Day 2                                                        | 1.1 ± 1.3 (459) | 1.0 ± 1.2 (442) | 0.1 (-0.1, 0.2)     | 0.2 ± 0.9 (459)                    | 0.2 ± 1.9 (441)  | 0.0 (-0.1, 0.1)     |
| Day 3                                                        | 1.0 ± 1.2 (434) | 1.0 ± 1.2 (415) | 0.0 (-0.1, 0.2)     | 0.1 ± 1.0 (434)                    | 0.1 ± 1.0 (414)  | 0.0 (-0.1, 0.1)     |
| Day 4                                                        | 1.0 ± 1.2 (417) | 1.0 ± 1.2 (387) | 0.1 (-0.1, 0.2)     | 0.1 ± 1.1 (417)                    | 0.11.0 (386)     | 0.0 (-0.1, 0.2)     |
| Day 7                                                        | 0.8 ± 1.2 (321) | 0.7 ± 1.1 (297) | 0.1 (-0.1, 0.3)     | -0.1 ± 1.2 (321)                   | -0.2 ± 1.1 (296) | 0.1 (-0.1, 0.3)     |
| <b>Liver</b>                                                 |                 |                 |                     |                                    |                  |                     |
| Baseline                                                     | 0.6 ± 1.1 (458) | 0.6 ± 1.1 (467) | -                   | -                                  | -                | -                   |
| Day 1                                                        | 0.6 ± 1.1 (440) | 0.6 ± 1.1 (437) | 0.0 (-0.1, 0.2)     | 0.1 ± 0.5 (440)                    | 0.1 ± 0.6 (436)  | 0.0 (-0.1, 0.1)     |
| Day 2                                                        | 0.6 ± 1.1 (432) | 0.6 ± 1.1 (415) | 0.0 (-0.2, 0.1)     | 0.0 ± 0.5 (432)                    | 0.1 ± 0.7 (414)  | -0.1 (-0.2, 0.0)    |
| Day 3                                                        | 0.7 ± 1.2 (411) | 0.7 ± 1.1 (391) | 0.0 (-0.2, 0.1)     | 0.1 ± 0.7 (411)                    | 0.1 ± 0.8 (390)  | -0.1 (-0.2, 0.1)    |
| Day 4                                                        | 0.7 ± 1.2 (395) | 0.7 ± 1.1 (366) | 0.0 (-0.2, 0.2)     | 0.1 ± 0.8 (395)                    | 0.2 ± 0.8 (365)  | 0.0 (-0.2, 0.1)     |
| Day 7                                                        | 0.7 ± 1.2 (305) | 0.7 ± 1.2 (282) | 0.1 (-0.3, 0.1)     | 0.1 ± 0.8 (305)                    | 0.2 ± 1.0 (281)  | -0.1 (-0.3, 0.0)    |
| <b>Cardiovascular</b>                                        |                 |                 |                     |                                    |                  |                     |
| Baseline                                                     | 2.3 ± 1.6 (488) | 2.5 ± 1.6 (496) | -                   | -                                  | -                | -                   |
| Day 1                                                        | 2.8 ± 1.5 (468) | 2.5 ± 1.5 (464) | 0.2 (0.1, 0.4)      | 0.5 ± 1.5 (468)                    | 0.1 ± 1.3 (463)  | 0.4 (0.2, 0.6)      |
| Day 2                                                        | 2.4 ± 1.5 (458) | 2.1 ± 1.6 (442) | 0.3 (0.1, 0.5)      | 0.2 ± 1.6 (458)                    | -0.3 ± 1.6 (441) | 0.5 (0.3, 0.7)      |
| Day 3                                                        | 2.0 ± 1.5 (434) | 1.8 ± 1.5 (415) | 0.2 (0.0, 0.4)      | -0.2 ± 1.8 (434)                   | -0.6 ± 1.7 (414) | 0.3 (0.1, 0.6)      |
| Day 4                                                        | 1.6 ± 1.5 (417) | 1.5 ± 1.5 (386) | 0.1 (-0.1, 0.3)     | -0.6 ± 1.8 (417)                   | -0.9 ± 1.7 (385) | 0.3 (0.0, 0.5)      |
| Day 7                                                        | 1.1 ± 1.3 (321) | 1.4 ± 1.4 (297) | -0.2 (-0.4, 0.0)    | -1.1 ± 1.8 (321)                   | -1.1 ± 1.8 (296) | 0.0 (-0.2, 0.3)     |
| <b>Renal</b>                                                 |                 |                 |                     |                                    |                  |                     |
| Baseline                                                     | 1.6 ± 1.5 (488) | 1.6 ± 1.6 (496) | -                   | -                                  | -                | -                   |
| Day 1                                                        | 1.6 ± 1.6 (468) | 1.6 ± 1.6 (464) | 0.0 (-0.2, 0.2)     | 0.0 ± 1.1 (468)                    | 0.1 ± 1.1 (463)  | 0.0 (-0.2, 0.1)     |
| Day 2                                                        | 1.6 ± 1.6 (459) | 1.6 ± 1.6 (442) | 0.0 (-0.2, 0.3)     | 0.0 ± 1.2 (459)                    | 0.1 ± 1.2 (441)  | 0.0 (-0.2, 0.2)     |
| Day 3                                                        | 1.7 ± 1.6 (434) | 1.6 ± 1.7 (415) | 0.1 (-0.1, 0.3)     | 0.1 ± 1.3 (434)                    | 0.1 ± 1.2 (414)  | 0.1 (-0.1, 0.2)     |
| Day 4                                                        | 1.6 ± 1.7 (417) | 1.6 ± 1.7 (387) | 0.0 (-0.2, 0.2)     | 0.0 ± 1.4 (417)                    | 0.1 ± 1.4 (386)  | 0.0 (-0.2, 0.2)     |
| Day 7                                                        | 1.6 ± 1.6 (321) | 1.7 ± 1.7 (297) | -0.1 (-0.3, 0.2)    | 0.0 ± 1.5 (321)                    | 0.1 ± 1.5 (296)  | 0.0 (-0.3, 0.2)     |
| <b>Non-pulmonary SOFA Total Score (excluding neurologic)</b> |                 |                 |                     |                                    |                  |                     |
| Baseline                                                     | 5.5 ± 3.4 (488) | 5.6 ± 3.4 (496) | -                   | -                                  | -                | -                   |
| Day 1                                                        | 6.0 ± 3.7 (468) | 5.7 ± 3.6 (464) | 0.4 (-0.1, 0.8)     | 0.7 ± 2.0 (468)                    | 0.3 ± 2.0 (463)  | 0.4 (0.2, 0.7)      |
| Day 2                                                        | 5.7 ± 3.9 (459) | 5.3 ± 3.7 (442) | 0.4 (-0.1, 0.9)     | 0.4 ± 2.3 (459)                    | 0.0 ± 2.5 (441)  | 0.4 (0.1, 0.7)      |
| Day 3                                                        | 5.3 ± 4.0 (434) | 5.0 ± 3.7 (415) | 0.3 (-0.2, 0.8)     | 0.1 ± 2.6 (434)                    | -0.3 ± 2.7 (414) | 0.3 (0.0, 0.7)      |
| Day 4                                                        | 4.8 ± 4.2 (417) | 4.6 ± 3.7 (387) | 0.2 (-0.4, 0.7)     | -0.4 ± 2.8 (417)                   | -0.6 ± 2.8 (386) | 0.2 (-0.2, 0.6)     |
| Day 7                                                        | 4.2 ± 3.7 (321) | 4.4 ± 3.8 (297) | -0.3 (-0.9, 0.3)    | -1.1 ± 3.0 (321)                   | -1.0 ± 3.2 (296) | 0.0 (-0.5, 0.5)     |

Plus-minus values are means ± SD (no.). Individual organ SOFA scores: range from 0 to 4, with higher scores indicative of worse organ dysfunction.<sup>11</sup> Coagulation is based on platelet count, liver on total bilirubin, cardiovascular on mean arterial pressure and vasopressor utilization, and renal on creatinine and urine output. Total SOFA score is the sum of individual organ scores.

**Table S17. Organ failure free days**

| Organ failure free days by day 28 | Intervention (N=501) | Control (N=505)     | Difference (95% CI) |
|-----------------------------------|----------------------|---------------------|---------------------|
| Any organ                         | 12.4 ± 11.3 (n=480)  | 12.5 ± 11.5 (n=479) | -0.1 (-1.5, 1.4)    |
| Cardiovascular                    | 16.8 ± 11.4 (n=493)  | 16.6 ± 11.7 (n=497) | 0.2 (-1.3, 1.6)     |
| Coagulation                       | 17.5 ± 11.8 (n=499)  | 17.7 ± 11.8 (n=504) | -0.2 (-1.7, 1.2)    |
| Hepatic                           | 17.9 ± 11.9 (n=471)  | 17.4 ± 11.9 (n=477) | 0.6 (-1.0, 2.1)     |
| Renal                             | 15.3 ± 11.8 (n=499)  | 15.4 ± 11.9 (n=504) | -0.1 (-1.6, 1.4)    |

Plus-minus values are means ± SD with (no.). We calculated the number of days without organ failure by subtracting the number of days with organ failure from the lesser of 28 days or the number of days to death if death occurred prior to day 29. Organs and systems were considered failure-free after patients were discharged from the hospital. For each organ, failure was defined as a sequential organ failure assessment (SOFA) score >2 (range: 0-4, where higher scores = greater dysfunction). No neurologic score was collected or assessed.<sup>11</sup>

**Table S18. Use of adjunctive therapies**

| Characteristic        | Day 0-2      |           |                     | Day 0-28     |            |                     |
|-----------------------|--------------|-----------|---------------------|--------------|------------|---------------------|
|                       | Intervention | Control   | Difference (95% CI) | Intervention | Control    | Difference (95% CI) |
| Any rescue therapy    | 93 (18.6)    | 90 (17.8) | 0.7 (-4.0, 5.5)     | 130 (25.9)   | 125 (24.8) | 1.2 (-4.2, 6.6)     |
| Prone positioning     | 68 (13.6)    | 60 (11.9) | 1.7 (-2.4, 5.8)     | 84 (16.8)    | 75 (14.9)  | 1.9 (-2.6, 6.4)     |
| Inhaled epoprostenol  | 16 (3.2)     | 17 (3.4)  | -0.2 (-2.4, 2.0)    | 26 (5.2)     | 27 (5.3)   | -0.2 (-2.9, 2.6)    |
| Recruitment maneuvers | 14 (2.8)     | 16 (3.2)  | -0.4 (-2.5, 1.7)    | 29 (5.8)     | 30 (5.9)   | -0.2 (-3.1, 2.8)    |
| Inhaled nitric oxide  | 4 (0.8)      | 12 (2.4)  | -1.6 (-3.1, 0.0)    | 7 (1.4)      | 17 (3.4)   | -2.0 (-3.8, -0.1)   |
| ECMO                  | 2 (0.4)      | 3 (0.6)   | -0.2 (-1.1, 0.7)    | 3 (0.6)      | 10 (2.0)   | -1.4 (-2.8, 0.0)    |

No. (%). Denominators are 501 and 505 in the intervention and control groups. ECMO denotes extracorporeal membrane oxygenation.

**Table S19. Glucocorticoid use during the first week**

| Study day | Overall         | Intervention    | Control         | Difference (95% CI)  |
|-----------|-----------------|-----------------|-----------------|----------------------|
| Day 1     | 25.2% (244/970) | 22.6% (109/482) | 27.7% (135/488) | -5.0% (-10.5%, 0.4%) |
| Day 2     | 24.2% (224/924) | 22.7% (105/463) | 25.8% (119/461) | -3.1% (-8.7%, 2.4%)  |
| Day 3     | 23.1% (207/897) | 22.2% (101/455) | 24.0% (106/442) | -1.8% (-7.3%, 3.7%)  |
| Day 4     | 21.1% (184/872) | 20.6% (91/442)  | 21.6% (93/430)  | -1.0% (-6.5%, 4.4%)  |
| Day 7     | 16.7% (130/778) | 17.0% (67/395)  | 16.4% (63/383)  | 0.5% (-4.7%, 5.8%)   |

Percentage determined by N / available records.

**Table S20. All-location mortality percentage estimates at study day 90 and day 365**

| Study day | Intervention | Control    | Difference (95% CI) | P-value |
|-----------|--------------|------------|---------------------|---------|
| Day 90    | 45.3 ± 2.2   | 45.3 ± 2.2 | 0.0 ± 3.1           | 0.99    |
| Day 365   | 51.1 ± 2.2   | 51.1 ± 2.2 | 0.0 ± 3.2           | 0.98    |

The mortality percentages are the point estimates for days 90 and 365 taken from the non-parametric interval censored survival functions (see Statistical Analysis in the Methods section of the paper). P-value is calculated from a Z test.

**Table S21. Outcomes at 3 months**

| Characteristic                                               | Intervention        | Control             | Difference (95% CI) |
|--------------------------------------------------------------|---------------------|---------------------|---------------------|
| Assessments                                                  |                     |                     |                     |
| EQ-5D-5L *                                                   | 0.66 ± 0.41 (n=207) | 0.73 ± 0.39 (n=194) | 0.0 (-0.1, 0.1)     |
| Difficulty in a daily activity - no./available records (%) ◇ | 168/212 (79.2)      | 154/196 (78.6)      | 0.7 (-7.3, 8.6)     |
| Disability Score †                                           | 3.3 ± 2.7 (n=212)   | 3.0 ± 2.7 (n=196)   | 0.3 (-0.3, 0.8)     |
| Self-rated Health ‡                                          | 3.4 ± 1.1 (n=164)   | 3.3 ± 1.0 (n=158)   | 0.1 (-0.1, 0.3)     |
| Pain Interference §                                          | 2.6 ± 1.4 (n=162)   | 2.6 ± 1.4 (n=157)   | 0.0 (-0.3, 0.3)     |
| PTSS - no. (%) ^                                             | -                   | -                   |                     |
| MoCA blind "                                                 | 22.2 ± 5.2 (n=154)  | 22.8 ± 4.8 (n=133)  | -0.6 (-1.7, 0.6)    |
| AD8 scores #                                                 | 3.1 ± 2.8 (n=45)    | 2.5 ± 2.6 (n=37)    | 0.6 (-0.6, 1.8)     |
| Other outcomes - no./available records (%)                   |                     |                     |                     |
| Location of residence % home                                 | 173/212 (81.6)      | 161/195 (82.6)      | -1.0 (-8.4, 6.5)    |
| Hospital readmission                                         | 69/211 (32.7)       | 63/195 (32.3)       | 0.4 (-8.7, 9.5)     |
| ER visit                                                     | 46/211 (21.8)       | 32/195 (16.4)       | 5.4 (-2.2, 13.0)    |
| Return to work - no./available records (%)                   | 32/212 (15.1)       | 34/196 (17.3)       | -2.3 (-9.4, 4.9)    |
| Significant change in work duties                            | 77/119 (64.7)       | 68/107 (63.6)       | 1.2 (-11.4, 13.7)   |
| Impact on daily activities - no. (%)                         | (n=246)             | (n=238)             |                     |
| Eating                                                       | 45 (18.3)           | 36 (15.1)           | 3.2 (-3.5, 9.8)     |
| Getting in or out of bed                                     | 93 (37.8)           | 84 (35.3)           | 2.5 (-6.1, 11.1)    |
| Using the toilet                                             | 82 (33.3)           | 66 (27.7)           | 5.6 (-2.6, 13.8)    |
| Preparing a hot meal                                         | 67 (27.2)           | 66 (27.7)           | -0.5 (-8.5, 7.5)    |
| Making phone calls                                           | 43 (17.5)           | 37 (15.5)           | 1.9 (-4.7, 8.5)     |
| Taking medications                                           | 49 (19.9)           | 44 (18.5)           | 1.4 (-5.6, 8.4)     |
| Managing money                                               | 40 (16.3)           | 46 (19.3)           | -3.1 (-9.9, 3.7)    |
| Shopping for groceries                                       | 97 (39.4)           | 87 (36.6)           | 2.9 (-5.8, 11.5)    |
| Stooping, kneeling or crouching                              | 154 (62.6)          | 158 (66.4)          | -3.8 (-12.3, 4.7)   |
| Lifting/carrying weights >10 pounds                          | 145 (58.9)          | 139 (58.4)          |                     |

Plus-minus values are means ± SD.

\* The EQ-5D-5L ranges from -0.109 to 1; higher scores indicate better quality of life, with less than 0 a state assessed by general population norms to be worse than death and 1 indicating good health.<sup>5</sup>

◇ Difficulty in a daily activity is the percentage reporting any difficulty in any of the 10 Katz Activity of Daily Living (ADL), Lawton Instrumental Activities of Daily Living (IADL), or Nagi scale items asked.<sup>6</sup>

† The Disability score ranges from 0 to 10 and is the number of those 10 ADL/IADL/Nagi items on which the respondent or their proxy reported difficulty due to health conditions, with higher scores representing worse disability, and scores of 4 or greater interpretable as representing severe disability.<sup>6</sup>

‡ Self-rated health was a five-point categorical score with 1 indicating excellent health and 5 indicating poor health.

§ Pain interference was a five-point categorical score with 1 indicating no interference with one's daily life and 5 indicating extreme interference.

^ The PTSS-14 ranges from 14 to 98, with higher scores indicate more symptoms, and with scores above 45 indicating a threshold for a higher likelihood of post-traumatic stress-like symptoms.<sup>7</sup>

" MOCA Blind score measures cognition where the individual themselves can be tested, ranging up to 30; scores above 26 are considered the normal range for cognition.<sup>8</sup>

# AD8 scores are used to assess cognition by proxies for the subset of patients alive but not able to respond themselves; AD8 scores range 0 to 8, with high scores suggesting worse cognitive function and scores greater than 2 indicating that cognitive impairment is likely to be present.<sup>9</sup>

**Table S22. Outcomes at 6 months**

| Characteristic                                               | Intervention        | Control             | Difference (95% CI) |
|--------------------------------------------------------------|---------------------|---------------------|---------------------|
| Assessments                                                  |                     |                     |                     |
| EQ-5D-5L *                                                   | 0.74 ± 0.27 (n=176) | 0.79 ± 0.28 (n=155) | 0.0 (-0.1, 0.1)     |
| Difficulty in a daily activity - no./available records (%) ◇ | 140/180 (77.8)      | 126/156 (80.8)      | -3.0 (-11.7, 5.7)   |
| Disability Score †                                           | 2.7 ± 2.4 (n=180)   | 2.7 ± 2.4 (n=156)   | 0.1 (-0.5, 0.6)     |
| Self-rated Health ‡                                          | 3.2 ± 1.0 (n=149)   | 3.3 ± 1.0 (n=132)   | -0.1 (-0.3, 0.2)    |
| Pain Interference §                                          | 2.6 ± 1.3 (n=148)   | 2.4 ± 1.2 (n=132)   | 0.2 (-0.1, 0.5)     |
| PTSS - no. (%) ^                                             | 38/145 (26.2)       | 31/122 (25.4)       | 0.8 (-9.7, 11.3)    |
| MoCA blind "                                                 | 22.8 ± 4.8 (n=138)  | 23.2 ± 5.1 (n=114)  | -0.3 (-1.6, 0.9)    |
| AD8 scores #                                                 | 2.2 ± 2.8 (n=31)    | 3.3 ± 2.7 (n=24)    | -1.1 (-2.6, 0.4)    |
| Other outcomes - no./available records (%)                   |                     |                     |                     |
| Location of residence % home                                 | 164/180 (91.1)      | 147/156 (94.2)      | -3.1 (-8.7, 2.4)    |
| Hospital readmission                                         | 46/180 (25.6)       | 43/156 (27.6)       | -2.0 (-11.5, 7.5)   |
| ER visit                                                     | 38/180 (21.1)       | 31/156 (19.9)       | 1.2 (-7.4, 9.9)     |
| Return to work - no./available records (%)                   | 40/180 (22.2)       | 31/156 (19.9)       | 2.4 (-6.4, 11.1)    |
| Significant change in work duties                            | 37/85 (43.5)        | 34/73 (46.6)        | -3.0 (-18.6, 12.5)  |
| Impact on daily activities – no. (%)                         | (n=218)             | (n=192)             |                     |
| Eating                                                       | 32 (14.7)           | 20 (10.4)           | 4.3 (-2.1, 10.7)    |
| Getting in or out of bed                                     | 63 (29.0) (n=217)   | 40 (20.8)           | 8.2 (-0.1, 16.5)    |
| Using the toilet                                             | 49 (22.6) (n=217)   | 41 (21.4)           | 1.2 (-6.8, 9.3)     |
| Preparing a hot meal                                         | 48 (22.1) (n=217)   | 40 (20.8)           | 1.3 (-6.7, 9.3)     |
| Making phone calls                                           | 27 (12.4)           | 20 (10.4)           | 2.0 (-4.1, 8.2)     |
| Taking medications                                           | 27 (12.4)           | 25 (13.0)           | -0.6 (-7.1, 5.9)    |
| Managing money                                               | 43 (19.8) (n=217)   | 35 (18.2)           | 1.6 (-6.0, 9.2)     |
| Shopping for groceries                                       | 75 (34.6) (n=217)   | 64 (33.3)           | 1.2 (-8.0, 10.4)    |
| Stooping, kneeling or crouching                              | 134 (61.8) (n=217)  | 126 (65.6)          | -3.9 (-13.2, 5.5)   |
| Lifting/carrying weights >10 pounds                          | 114 (52.5) (n=217)  | 106 (55.2)          | -2.7 (-12.3, 7.0)   |

Plus-minus values are means ± SD.

\* The EQ-5D-5L ranges from -0.109 to 1; higher scores indicate better quality of life, with less than 0 a state assessed by general population norms to be worse than death and 1 indicating good health.<sup>5</sup>

◇ Difficulty in a daily activity is the percentage reporting any difficulty in any of the 10 Katz Activity of Daily Living (ADL), Lawton Instrumental Activities of Daily Living (IADL), or Nagi scale items asked.<sup>6</sup>

† The Disability score ranges from 0 to 10 and is the number of those 10 ADL/IADL/Nagi items on which the respondent or their proxy reported difficulty due to health conditions, with higher scores representing worse disability, and scores of 4 or greater interpretable as representing severe disability.<sup>6</sup>

‡ Self-rated health was a five-point categorical score with 1 indicating excellent health and 5 indicating poor health.

§ Pain interference was a five-point categorical score with 1 indicating no interference with one's daily life and 5 indicating extreme interference.

^ The PTSS-14 ranges from 14 to 98, with higher scores indicate more symptoms, and with scores above 45 indicating a threshold for a higher likelihood of post-traumatic stress-like symptoms.<sup>7</sup>

" MOCA Blind score measures cognition where the individual themselves can be tested, ranging up to 30; scores above 26 are considered the normal range for cognition.<sup>8</sup>

# AD8 scores are used to assess cognition by proxies for the subset of patients alive but not able to respond themselves; AD8 scores range 0 to 8, with high scores suggesting worse cognitive function and scores greater than 2 indicating that cognitive impairment is likely to be present.<sup>9</sup>

**Table S23. Outcomes at 12 months**

| Characteristic                                               | Intervention        | Control             | Difference (95% CI) |
|--------------------------------------------------------------|---------------------|---------------------|---------------------|
| Assessments                                                  |                     |                     |                     |
| EQ-5D-5L *                                                   | 0.75 ± 0.26 (n=127) | 0.77 ± 0.29 (n=119) | 0.0 (-0.1, 0.1)     |
| Difficulty in a daily activity - no./available records (%) ◇ | 100/128 (78.1)      | 89/119 (74.8)       | 3.3 (-7.3, 13.9)    |
| Disability Score †                                           | 2.9 ± 2.6 (n=128)   | 2.4 ± 2.3 (n=119)   | 0.5 (-0.1, 1.1)     |
| Self-rated Health ‡                                          | 3.3 ± 1.0 (n=107)   | 3.3 ± 1.0 (n=100)   | 0.0 (-0.3, 0.3)     |
| Pain Interference §                                          | 2.4 ± 1.3 (n=107)   | 2.5 ± 1.3 (n=99)    | -0.1 (-0.4, 0.3)    |
| PTSS - no. (%) ^                                             | 21/103 (20.4)       | 38/94 (40.4)        | -20.0 (-32.6, -7.4) |
| MoCA blind "                                                 | 23.3 ± 4.9 (n=99)   | 24.0 ± 4.4 (n=88)   | -0.8 (-2.1, 0.6)    |
| AD8 scores #                                                 | 3.6 ± 3.1 (n=22)    | 2.8 ± 2.8 (n=19)    | 0.8 (-1.1, 2.7)     |
| Other outcomes - no./available records (%)                   |                     |                     |                     |
| Location of residence % home                                 | 121/128 (94.5)      | 113/119 (95.0)      | -0.4 (-6.0, 5.1)    |
| Hospital readmission                                         | 47/128 (36.7)       | 43/118 (36.4)       | 0.3 (-11.8, 12.3)   |
| ER visit                                                     | 38/127 (29.9)       | 31/118 (26.3)       | 3.7 (-7.6, 14.9)    |
| Return to work - no./available records (%)                   | 25/127 (19.7)       | 26/119 (21.8)       | -2.2 (-12.3, 8.0)   |
| Significant change in work duties                            | 19/43 (44.2)        | 22/54 (40.7)        | 3.4 (-16.4, 23.2)   |
| Impact on daily activities - no. (%)                         | (n=163)             | (n=153)             |                     |
| Eating                                                       | 24 (14.7)           | 16 (10.5) (n=152)   | 4.3 (-3.0, 11.6)    |
| Getting in or out of bed                                     | 44 (27.0)           | 37 (24.2)           | 2.8 (-6.8, 12.4)    |
| Using the toilet                                             | 33 (20.2)           | 37 (24.2)           | -3.9 (-13.1, 5.2)   |
| Preparing a hot meal                                         | 30 (18.4)           | 34 (22.2)           | -3.8 (-12.7, 5.1)   |
| Making phone calls                                           | 21 (12.9)           | 21 (13.7)           | -0.8 (-8.3, 6.7)    |
| Taking medications                                           | 28 (17.2)           | 26 (17.0)           | 0.2 (-8.1, 8.5)     |
| Managing money                                               | 38 (23.3)           | 26 (17.0)           | 6.3 (-2.5, 15.1)    |
| Shopping for groceries                                       | 59 (36.2)           | 48 (31.4)           | 4.8 (-5.6, 15.2)    |
| Stooping, kneeling or crouching                              | 107 (65.6)          | 96 (62.7)           | 2.9 (-7.7, 13.5)    |
| Lifting/carrying weights 10 pounds                           | 85 (52.1)           | 77 (50.3)           | 1.8 (-9.2, 12.8)    |

Plus-minus values are means ± SD.

\* The EQ-5D-5L ranges from -0.109 to 1; higher scores indicate better quality of life, with less than 0 a state assessed by general population norms to be worse than death and 1 indicating good health.<sup>5</sup>

◇ Difficulty in a daily activity is the percentage reporting any difficulty in any of the 10 Katz Activity of Daily Living (ADL), Lawton Instrumental Activities of Daily Living (IADL), or Nagi scale items asked.<sup>6</sup>

† The Disability score ranges from 0 to 10 and is the number of those 10 ADL/IADL/Nagi items on which the respondent or their proxy reported difficulty due to health conditions, with higher scores representing worse disability, and scores of 4 or greater interpretable as representing severe disability.<sup>6</sup>

‡ Self-rated health was a five-point categorical score with 1 indicating excellent health and 5 indicating poor health.

§ Pain interference was a five-point categorical score with 1 indicating no interference with one's daily life and 5 indicating extreme interference.

^ The PTSS-14 ranges from 14 to 98, with higher scores indicate more symptoms, and with scores above 45 indicating a threshold for a higher likelihood of post-traumatic stress-like symptoms.<sup>7</sup>

" MOCA Blind score measures cognition where the individual themselves can be tested, ranging up to 30; scores above 26 are considered the normal range for cognition.<sup>8</sup>

# AD8 scores are used to assess cognition by proxies for the subset of patients alive but not able to respond themselves; AD8 scores range 0 to 8, with high scores suggesting worse cognitive function and scores greater than 2 indicating that cognitive impairment is likely to be present.<sup>9</sup>



**Table S24. Safety measures observed during the 6 hours after randomization**

| Characteristic                            | Intervention (N=501) | Control (N=505)     | Difference (95% CI) |
|-------------------------------------------|----------------------|---------------------|---------------------|
| Fluid bolus given - % yes                 | 16.4                 | 14.7                | 1.7 (-2.8, 6.2)     |
| Vasopressors started or increased - % yes | 45.9                 | 36.6                | 9.3 (3.2, 15.3)     |
| Fluid intake                              | 1161 ± 1170 (n=498)  | 1101 ± 1089 (n=502) | 60 (-80, 201)       |
| Fluid output                              | 519 ± 666 (n=495)    | 545 ± 665 (n=498)   | -25 (-108, 57)      |

Plus-minus values are means ± SD.

**Table S25. Adverse events by organ system, event and severity**

| System/disorder      | Event                                      | Severity                          | Intervention | Control | Overall | P-value |      |
|----------------------|--------------------------------------------|-----------------------------------|--------------|---------|---------|---------|------|
| Blood/lymphatic      | Methemoglobinemia                          | Serious                           | 2            | 0       | 2       | 0.16    |      |
| Cardiac              | Complete atrioventricular block            | Serious                           | 1            | 0       | 1       | 0.32    |      |
|                      | Atrial fibrillation (paroxysmal)           | Non-Serious                       | 1            | 0       | 1       | 0.32    |      |
|                      | Atrial fibrillation w/ rapid vent response | Serious                           | 1            | 0       | 1       | 0.32    |      |
|                      | Bradycardia                                |                                   | Serious      | 1       | 0       | 1       | 0.18 |
|                      |                                            |                                   | Non-Serious  | 1       | 0       | 1       |      |
|                      | Cardiac arrest                             |                                   | Serious      | 6       | 2       | 8       | 0.3  |
|                      |                                            |                                   | Non-Serious  | 0       | 2       | 2       |      |
|                      |                                            | Cardiac arrhythmia (NOS)          | Non-Serious  | 1       | 0       | 1       | 0.32 |
|                      |                                            | 3rd degree atrioventricular block | Serious      | 0       | 1       | 1       | 0.32 |
|                      |                                            | Myocardial infarction             | Serious      | 1       | 1       | 2       | 1.0  |
|                      |                                            | Serious prolonged bradycardia     | Non-Serious  | 1       | 0       | 1       | 0.32 |
|                      |                                            | Tachycardia                       | Non-Serious  | 1       | 0       | 1       | 0.32 |
|                      |                                            | Supraventricular tachycardia      | Serious      | 1       | 0       | 1       | 0.32 |
|                      |                                            | Torsades De Pointe                | Serious      | 1       | 0       | 1       | 0.32 |
|                      | Vasovagal reaction                         | Non-Serious                       | 0            | 1       | 1       | 0.32    |      |
|                      | Ventricular tachycardia                    | Serious                           | 2            | 0       | 2       | 0.16    |      |
| Gastrointestinal     | Ileus                                      | Non-Serious                       | 0            | 1       | 1       | 0.32    |      |
| General              | Death *                                    | Serious                           | 1            | 0       | 1       | 0.32    |      |
| Infection            | Pneumonia                                  | Non-Serious                       | 0            | 1       | 1       | 0.32    |      |
| Injury               | Paralysis awareness                        | Non-Serious                       | 1            | 0       | 1       | 0.32    |      |
| Metabolism/nutrition | Hyperkalemia                               | Serious                           | 0            | 1       | 1       | 0.32    |      |
| Musculoskeletal      | Myopathy                                   | Non-Serious                       | 1            | 0       | 1       | 0.32    |      |
| Nervous system       | Intracranial bleed                         | Serious                           | 0            | 1       | 1       | 0.32    |      |
|                      | Cerebral infarction                        | Serious                           | 1            | 1       | 2       | 1.0     |      |
|                      | Cerebrovascular accident                   | Serious                           | 1            | 0       | 1       | 0.32    |      |
|                      | Brain hemorrhage                           | Serious                           | 1            | 1       | 2       | 1.0     |      |
|                      | Polyneuropathy                             | Serious                           | 0            | 1       | 1       | 0.32    |      |
|                      | Seizure                                    | Serious                           | 1            | 0       | 1       | 0.32    |      |
|                      | Stroke                                     | Serious                           | 3            | 1       | 4       | 0.32    |      |
|                      | Subarachnoid hemorrhage                    | Serious                           | 0            | 1       | 1       | 0.32    |      |
|                      | Subdural effusion                          | Serious                           | 1            | 0       | 1       | 0.32    |      |

| System/disorder               | Event                      | Severity    | Intervention | Control | Overall | P-value |
|-------------------------------|----------------------------|-------------|--------------|---------|---------|---------|
| Respiratory tract             | Aspiration                 | Serious     | 0            | 1       | 1       | 0.18    |
|                               |                            | Non-Serious | 0            | 1       | 1       |         |
| Vascular disorders            | Airway obstruction         | Serious     | 1            | 0       | 1       | 0.32    |
|                               | Hematoma                   | Serious     | 0            | 1       | 1       | 0.32    |
|                               | Retroperitoneal hemorrhage | Non-Serious | 0            | 1       | 1       | 0.32    |
|                               | Hypotension                | Serious     | 1            | 1       | 2       | 0.32    |
|                               |                            | Non-Serious | 6            | 2       | 8       |         |
| Superficial venous thrombosis | Non-Serious                | 1           | 0            | 1       | 0.32    |         |

Adverse events were compared between groups with the event the unit of analysis. P-value calculated from weighted Poisson regression with non-serious events weighted by one and serious events weighted by two.

\* Although mortality was high in both groups, only one death was considered 'possibly related' to study drug.

**Table S26. Mortality percentage estimates during the first 48 and 96 hours**

| Time           | Intervention (N=501) | Control (N=505) | Difference (95% CI) | P-value |
|----------------|----------------------|-----------------|---------------------|---------|
| First 48 hours | 8.4 (n=42)           | 11.1 (n=56)     | -2.7 (-6.4 to 1.0)  | 0.15    |
| First 96 hours | 12.5 (n=63)          | 15.8 (n=80)     | -3.3 (-7.6 to 1.0)  | 0.14    |

Mortality percentage - (# of patients who died/# of patients enrolled) x 100 (no.). P-value calculated from Wald test.

**Table S27. In-hospital recall assessments**

| Characteristic                                     | Intervention (N=181) | Control (N=198) | Difference (95% CI) |
|----------------------------------------------------|----------------------|-----------------|---------------------|
| Remember something - no. (%)                       | 47 (26.0)            | 56 (28.3)       | -2.3 (-11.3, 6.6)   |
| First thing you remember after waking up - no. (%) |                      |                 |                     |
| Other                                              | 49 (27.1)            | 50 (25.3)       | -                   |
| Being in the ICU                                   | 29 (16.0)            | 19 (9.6)        | -                   |
| Nothing                                            | 26 (14.4)            | 28 (14.1)       | -                   |
| Hearing voices                                     | 24 (13.3)            | 19 (9.6)        | -                   |
| Being with family                                  | 23 (12.7)            | 33 (16.7)       | -                   |
| Feeling breathing tube                             | 22 (12.2)            | 33 (16.7)       | -                   |
| Feeling pain                                       | 6 (3.3)              | 14 (7.1)        | -                   |
| Feeling mask on face                               | 2 (1.1)              | 2 (1.0)         | -                   |
| Dreamed in ICU - no. (%)                           | 73 (40.3)            | 84 (42.4)       | -2.1 (-12.0, 7.8)   |
| Disturbing ICU dream - no. (%) *                   | 41 (56.2)            | 49 (58.3)       | -2.2 (-17.7, 13.3)  |
| Worse thing in ICU - no. (%)                       |                      |                 |                     |
| Other                                              | 75 (41.4)            | 87 (43.9)       | -                   |
| Unable to carry out usual activities               | 53 (29.3)            | 39 (19.7)       | -                   |
| Anxiety                                            | 17 (9.4)             | 30 (15.2)       | -                   |
| Pain                                               | 15 (8.3)             | 17 (8.6)        | -                   |
| Recovery process                                   | 12 (6.6)             | 18 (9.1)        | -                   |
| Awareness                                          | 9 (5.0)              | 7 (3.5)         | -                   |

\* Intervention (n=73), control (n=84). ICU denotes intensive care unit.

**Table S28. In-hospital neuromuscular assessments**

| Characteristic                                            | Intervention (N=501) | Control (N=505) | Difference (95% CI)               |
|-----------------------------------------------------------|----------------------|-----------------|-----------------------------------|
| Moved arms or legs on day 3 - no. (%)                     | (n=455)              | (n=442)         | -9.9 (-16.4, -3.4)                |
| No                                                        | 257 (56.5)           | 206 (46.6)      |                                   |
| Yes                                                       | 198 (43.5)           | 236 (53.4)      |                                   |
| Highest level of physical activity - no. (%) * $\diamond$ |                      |                 |                                   |
| Day 1                                                     | (n=482)              | (n=488)         |                                   |
| None                                                      | 470 (97.5)           | 438 (89.8)      | -7.8% (-10.8%, -4.7%) $\diamond$  |
| Sitting/exercising in bed                                 | 11 (2.3)             | 37 (7.6)        |                                   |
| Passively moving to chair                                 | 1 (0.2)              | 0 (0.0)         |                                   |
| Sitting over edge of bed or more                          | 0 (0.0)              | 2 (0.4)         |                                   |
| Day 2                                                     | (n=463)              | (n=461)         |                                   |
| None                                                      | 436 (94.2)           | 376 (81.6)      | -12.6% (-16.7%, -8.5%) $\diamond$ |
| Sitting/exercising in bed                                 | 17 (3.7)             | 49 (10.6)       |                                   |
| Passively moving to chair                                 | 4 (0.9)              | 5 (1.1)         |                                   |
| Sitting over edge of bed or more                          | 6 (1.2)              | 31 (6.7)        |                                   |
| Day 3                                                     | (n=455)              | (n=442)         |                                   |
| None                                                      | 384 (84.4)           | 332 (75.1)      | -9.3% (-14.5%, -4.1%) $\diamond$  |
| Sitting/exercising in bed                                 | 42 (9.2)             | 66 (14.9)       |                                   |
| Passively moving to chair                                 | 7 (1.5)              | 6 (1.4)         |                                   |
| Sitting over edge of bed or more                          | 4 (0.9)              | 6 (1.4)         |                                   |
| Day 4                                                     | (n=442)              | (n=430)         |                                   |
| None                                                      | 345 (78.1)           | 299 (69.5)      | -8.5% (-14.3%, -2.7%) $\diamond$  |
| Sitting/exercising in bed                                 | 51 (11.5)            | 59 (13.7)       |                                   |
| Passively moving to chair                                 | 9 (2.0)              | 6 (1.4)         |                                   |
| Sitting over edge of bed or more                          | 2 (0.5)              | 12 (2.8)        |                                   |
| Day 5                                                     | (n=431)              | (n=414)         |                                   |
| None                                                      | 313 (72.6)           | 271 (65.5)      | -7.2% (-13.4%, -0.9%) $\diamond$  |
| Sitting/exercising in bed                                 | 58 (13.5)            | 60 (14.5)       |                                   |
| Passively moving to chair                                 | 8 (1.9)              | 12 (2.9)        |                                   |
| Sitting over edge of bed or more                          | 5 (1.2)              | 8 (1.9)         |                                   |
| Day 6                                                     | (n=412)              | (n=397)         |                                   |
| None                                                      | 280 (68.0)           | 238 (59.9)      | -8.0% (-14.6%, -1.4%) $\diamond$  |
| Sitting/exercising in bed                                 | 50 (12.1)            | 63 (15.9)       |                                   |
| Passively moving to chair                                 | 16 (3.9)             | 13 (3.3)        |                                   |
| Sitting over edge of bed or more                          | 6 (1.5)              | 9 (2.3)         |                                   |
| Day 7                                                     | (n=395)              | (n=383)         |                                   |
| None                                                      | 244 (61.8)           | 212 (55.4)      | -6.4% (-13.3%, 0.5%) $\diamond$   |
| Sitting/exercising in bed                                 | 49 (12.4)            | 60 (15.7)       |                                   |
| Passively moving to chair                                 | 24 (6.1)             | 12 (3.1)        |                                   |
| Sitting over edge of bed or more                          | 14 (3.5)             | 9 (2.3)         |                                   |

| Characteristic                              | Intervention (N=501) | Control (N=505) | Difference (95% CI) |
|---------------------------------------------|----------------------|-----------------|---------------------|
| Manual muscle testing – means ± SD, (no.) † |                      |                 |                     |
| Right Shoulder Abduction                    |                      |                 |                     |
| Day 7                                       | 3.8 ± 1.3 (121)      | 4.1 ± 1.1 (131) | -0.3 (-0.6, 0.0)    |
| Day 14                                      | 4.0 ± 1.1 (110)      | 3.9 ± 1.2 (116) | 0.0 (-0.3, 0.4)     |
| Day 21                                      | 3.8 ± 1.4 (73)       | 4.0 ± 1.1 (84)  | -0.2 (-0.6, 0.3)    |
| Day 28                                      | 3.6 ± 1.5 (50)       | 4.1 ± 1.0 (53)  | -0.5 (-1.0, 0.0)    |
| Left Shoulder Abduction                     |                      |                 |                     |
| Day 7                                       | 3.8 ± 1.4 (124)      | 4.1 ± 1.2 (132) | -0.3 (-0.6, 0.0)    |
| Day 14                                      | 4.0 ± 1.2 (109)      | 3.9 ± 1.2 (114) | 0.0 (-0.3, 0.3)     |
| Day 21                                      | 3.8 ± 1.4 (72)       | 3.9 ± 1.2 (82)  | -0.1 (-0.6, 0.3)    |
| Day 28                                      | 3.6 ± 1.4 (50)       | 4.0 ± 1.0 (52)  | -0.5 (-1.0, 0.0)    |
| Right Elbow Flexion                         |                      |                 |                     |
| Day 7                                       | 4.0 ± 1.2 (126)      | 4.2 ± 1.1 (132) | -0.2 (-0.5, 0.1)    |
| Day 14                                      | 4.1 ± 1.0 (111)      | 4.1 ± 1.2 (117) | 0.0 (-0.3, 0.3)     |
| Day 21                                      | 3.9 ± 1.4 (75)       | 4.1 ± 1.0 (84)  | -0.2 (-0.6, 0.2)    |
| Day 28                                      | 4.0 ± 1.2 (48)       | 4.3 ± 0.9 (54)  | -0.2 (-0.7, 0.2)    |
| Left Elbow Flexion                          |                      |                 |                     |
| Day 7                                       | 4.0 ± 1.2 (126)      | 4.1 ± 1.1 (131) | -0.1 (-0.4, 0.2)    |
| Day 14                                      | 4.1 ± 1.1 (110)      | 4.1 ± 1.1 (117) | 0.0 (-0.3, 0.3)     |
| Day 21                                      | 3.9 ± 1.4 (75)       | 4.1 ± 1.1 (82)  | -0.2 (-0.6, 0.2)    |
| Day 28                                      | 4.0 ± 1.1 (48)       | 4.2 ± 0.9 (54)  | -0.2 (-0.6, 0.2)    |
| Right Wrist Extension                       |                      |                 |                     |
| Day 7                                       | 4.0 ± 1.2 (126)      | 4.3 ± 1.1 (129) | -0.2 (-0.5, 0.1)    |
| Day 14                                      | 4.2 ± 1.0 (109)      | 4.2 ± 1.1 (118) | 0.1 (-0.2, 0.3)     |
| Day 21                                      | 3.9 ± 1.4 (74)       | 4.2 ± 1.0 (83)  | -0.3 (-0.7, 0.1)    |
| Day 28                                      | 4.0 ± 1.2 (46)       | 4.4 ± 0.9 (54)  | -0.4 (-0.8, 0.0)    |
| Left Wrist Extension                        |                      |                 |                     |
| Day 7                                       | 4.1 ± 1.2 (125)      | 4.2 ± 1.1 (130) | -0.2 (-0.4, 0.1)    |
| Day 14                                      | 4.2 ± 1.1 (108)      | 4.2 ± 1.0 (117) | 0.0 (-0.3, 0.3)     |
| Day 21                                      | 3.8 ± 1.4 (74)       | 4.1 ± 1.1 (81)  | -0.3 (-0.7, 0.1)    |
| Day 28                                      | 4.0 ± 1.2 (47)       | 4.3 ± 0.9 (53)  | -0.3 (-0.7, 0.1)    |
| Right Hip Flexion                           |                      |                 |                     |
| Day 7                                       | 3.7 ± 1.5 (118)      | 3.9 ± 1.3 (125) | -0.3 (-0.6, 0.1)    |
| Day 14                                      | 3.8 ± 1.2 (99)       | 3.7 ± 1.3 (108) | 0.1 (-0.2, 0.5)     |
| Day 21                                      | 3.7 ± 1.5 (69)       | 3.6 ± 1.3 (77)  | 0.1 (-0.4, 0.5)     |
| Day 28                                      | 3.6 ± 1.5 (43)       | 3.8 ± 1.3 (49)  | -0.3 (-0.5, 0.3)    |
| Left Hip Flexion                            |                      |                 |                     |
| Day 7                                       | 3.7 ± 1.4 (113)      | 3.9 ± 1.3 (123) | -0.2 (-0.5, 0.2)    |
| Day 14                                      | 3.8 ± 1.2 (96)       | 3.8 ± 1.2 (109) | 0.0 (-0.3, 0.4)     |
| Day 21                                      | 3.7 ± 1.5 (68)       | 3.5 ± 1.4 (75)  | 0.2 (-.3, 0.3)      |
| Day 28                                      | 3.6 ± 1.4 (42)       | 3.7 ± 1.3 (48)  | -0.1 (-0.7, 0.5)    |
| Right Knee Extension                        |                      |                 |                     |
| Day 7                                       | 3.8 ± 1.4 (119)      | 4.1 ± 1.2 (128) | -0.3 (-0.6, 0.1)    |
| Day 14                                      | 4.0 ± 1.1 (101)      | 3.9 ± 1.3 (114) | 0.0 (-0.3, 0.3)     |
| Day 21                                      | 3.7 ± 1.5 (72)       | 3.9 ± 1.3 (79)  | -0.2 (-0.6, 0.3)    |
| Day 28                                      | 3.8 ± 1.4 (47)       | 4.0 ± 1.2 (50)  | -0.2 (-0.8, 0.3)    |

| Characteristic          | Intervention (N=501) | Control (N=505) | Difference (95% CI) |
|-------------------------|----------------------|-----------------|---------------------|
| Left Knee Extension     |                      |                 |                     |
| Day 7                   | 3.9 ± 1.3 (114)      | 4.1 ± 1.2 (128) | -0.2 (-0.5, 0.1)    |
| Day 14                  | 4.0 ± 1.1 (96)       | 4.0 ± 1.2 (113) | -0.1 (-0.4, 0.2)    |
| Day 21                  | 3.7 ± 1.4 (70)       | 3.8 ± 1.3 (76)  | -0.2 (-0.6, 0.3)    |
| Day 28                  | 3.8 ± 1.3 (44)       | 4.0 ± 1.2 (49)  | -0.2 (-0.7, 0.3)    |
| Right Foot Dorsiflexion |                      |                 |                     |
| Day 7                   | 4.0 ± 1.3 (118)      | 4.2 ± 1.2 (130) | -0.1 (-0.5, 0.2)    |
| Day 14                  | 4.1 ± 1.1 (104)      | 4.2 ± 1.1 (117) | 0.0 (-0.3, 0.3)     |
| Day 21                  | 3.9 ± 1.4 (72)       | 4.3 ± 0.9 (79)  | -0.4 (-0.8, 0.0)    |
| Day 28                  | 3.7 ± 1.4 (46)       | 4.3 ± 1.0 (51)  | -0.6 (-1.1, -0.1)   |
| Left Foot Dorsiflexion  |                      |                 |                     |
| Day 7                   | 4.0 ± 1.3 (113)      | 4.2 ± 1.2 (127) | -0.2 (-0.5, 0.2)    |
| Day 14                  | 4.1 ± 1.0 (97)       | 4.2 ± 1.1 (116) | 0.0 (-0.3, 0.3)     |
| Day 21                  | 3.8 ± 1.4 (70)       | 4.2 ± 1.0 (75)  | -0.4 (-0.8, 0.0)    |
| Day 28                  | 3.7 ± 1.4 (42)       | 4.3 ± 0.9 (52)  | -0.6 (-1.1, 0.2)    |

Plus-minus values are means ± SD with (no.).

- \* Physical activity was assessed with a condensed ICU mobility scale.<sup>12</sup> Normal range 0-10, where 0 = not actively moving, 1 sitting and exercising in bed, 2 passively moving to a chair, or 3 or move sitting over edge of bed to walking independently without a gait aid.
- ◇ Highest level of daily activity was analyzed with Cochran-Mantel-Haenszel test, with difference (95% CI) shown for no activity versus any activity.
- † Manual muscle testing was assessed using the Medical Research Council score: for each individual muscle [range: 0 (no movement observed) to 5 (muscle contracts normally against full resistance)].

## References

---

1. Sessler CN, Gosnell MS, Grap MJ, et al. The Richmond Agitation-Sedation Scale: validity and reliability in adult intensive care unit patients. *Am J Respir Crit Care Med* 2002;166:1338-44.
2. Riker RR, Fraser GL, Cox PM. Continuous infusion of haloperidol controls agitation in critically ill patients. *Crit Care Med* 1994;22:433-40.
3. Ramsay MA, Savege TM, Simpson BR, Goodwin R. Controlled sedation with alphaxalone-alphadolone. *Br Med J* 1974;2:656-9.
4. Kleyweg RP, van der Meche FG, Schmitz PI. Interobserver agreement in the assessment of muscle strength and functional abilities in Guillain-Barre syndrome. *Muscle Nerve* 1991;14:1103-9.
5. Herdman M, Gudex C, Lloyd A, et al. Development and preliminary testing of the new five-level version of EQ-5D (EQ-5D-5L). *Qual Life Res* 2011;20:1727-36.
6. Ware J, Jr., Kosinski M, Keller SD. A 12-Item Short-Form Health Survey: construction of scales and preliminary tests of reliability and validity. *Med Care* 1996;34:220-33.
7. Twigg E, Humphris G, Jones C, Bramwell R, Griffiths RD. Use of a screening questionnaire for post-traumatic stress disorder (PTSD) on a sample of UK ICU patients. *Acta Anaesthesiol Scand* 2008;52:202-8.
8. Hobson J. The Montreal Cognitive Assessment (MoCA). *Occup Med (Lond)* 2015;65:764-5.
9. Galvin JE, Roe CM, Powlishta KK, et al. The AD8: a brief informant interview to detect dementia. *Neurology* 2005;65:559-64.
10. Papazian L, Forel JM, Gacouin A, et al. Neuromuscular blockers in early acute respiratory distress syndrome. *The New England Journal of Medicine* 2010;363:1107-16.
11. Vincent JL, Moreno R, Takala J, et al. The SOFA (Sepsis-related Organ Failure Assessment) score to describe organ dysfunction/failure. On behalf of the Working Group on Sepsis-Related Problems of the European Society of Intensive Care Medicine. *Intensive Care Med* 1996;22:707-10.
12. Hodgson C, Needham D, Haines K, et al. Feasibility and inter-rater reliability of the ICU Mobility Scale. *Heart Lung* 2014;43:19-24.
